# Supplementary material for: Prevalence of 25 canine behavioral problems and relevant factors of each behavior in Japan
Source: PubMed Central journal article supplement — J Vet Med Sci. 2019 Jun 5;81(8):1090–6. doi: 10.1292/jvms.18-0705 (PMC6715928; doi:10.1292/jvms.18-0705), 2019-06-05
Supplement: jvms-81-1090-s001.pdf [file jvms-81-1090-s001.pdf]

Table S1. The online questionnaire used in this study

| Title: Questionnaire regarding dog's behaviors and owner's feelings                                                                                                                                                                                                                                                                                                                                                                                                                                                                                                                                                                                                                                                                                                                                                                                                                                                                                                                                                                                                                                                                                                                                                                                                                                                                                                                                                                                                                                                                                                                          |                                                                                                                                                                                                                                                                                                                                                                                                                                                                                                                                                                                                                                                                     |
|----------------------------------------------------------------------------------------------------------------------------------------------------------------------------------------------------------------------------------------------------------------------------------------------------------------------------------------------------------------------------------------------------------------------------------------------------------------------------------------------------------------------------------------------------------------------------------------------------------------------------------------------------------------------------------------------------------------------------------------------------------------------------------------------------------------------------------------------------------------------------------------------------------------------------------------------------------------------------------------------------------------------------------------------------------------------------------------------------------------------------------------------------------------------------------------------------------------------------------------------------------------------------------------------------------------------------------------------------------------------------------------------------------------------------------------------------------------------------------------------------------------------------------------------------------------------------------------------|---------------------------------------------------------------------------------------------------------------------------------------------------------------------------------------------------------------------------------------------------------------------------------------------------------------------------------------------------------------------------------------------------------------------------------------------------------------------------------------------------------------------------------------------------------------------------------------------------------------------------------------------------------------------|
| Questions                                                                                                                                                                                                                                                                                                                                                                                                                                                                                                                                                                                                                                                                                                                                                                                                                                                                                                                                                                                                                                                                                                                                                                                                                                                                                                                                                                                                                                                                                                                                                                                    | Expressions in the present study                                                                                                                                                                                                                                                                                                                                                                                                                                                                                                                                                                                                                                    |
| <p>Q1. Please select one answer that applies to you.</p> <p>1 Age [teens/20s/30s/40s/50s/60s/70s/80s and over]</p> <p>2 Sex [male/female]</p> <p>3 Present residential area [urban/suburban/rural area]</p> <p>4<sup>a)</sup> Present type of residence [house with garden/house without garden/apartment]</p> <p>5<sup>b)</sup> Number of dogs in the household [1/2/more than 2]</p>                                                                                                                                                                                                                                                                                                                                                                                                                                                                                                                                                                                                                                                                                                                                                                                                                                                                                                                                                                                                                                                                                                                                                                                                       |                                                                                                                                                                                                                                                                                                                                                                                                                                                                                                                                                                                                                                                                     |
| <p>Q2. Please tell us about your dog. If you have multiple dogs, please answer about one specific dog only. Please select one answer that applies, for questions 3 to 8.</p> <p>1 Breed [ ]</p> <p>2 Age [ ] years and [ ] months/unknown (approximately [ ] years old)</p> <p>3 Body weight [less than 3 kg/3–5 kg/5–10 kg/10–15 kg/15–20 kg/20–30 kg/more than 30 kg]</p> <p>4 Sex [neutered male/intact male/neutered female/intact female]<br/>If your dog is neutered, please tell us when it was neutered: [under 6 months old/6 months to 1 year old/1 year old or more/unknown]</p> <p>5 Dog's living area [mainly inside/mainly outside/both]</p> <p>6<sup>c)</sup> Source of acquisition [pet shop/breeder/acquaintance/adopted a stray dog/adopted from Internet forum/adopted from public animal shelter/adopted from private organization/other [ ]]</p> <p>7 Age at acquisition [under 6 months old ([ ] weeks old)/6 months to 1 year old/1 year old or over/unknown]</p> <p>8<sup>d)</sup> Attitude about food [your dog eats anything without leaving anything/your dog is picky (eats only its favorite food)/your dog has little interest in food and does not eat very much]</p> <p>9<sup>d)</sup> Habits of cleaning dog's paws [usually take your dog for a walk, and wash or wipe the dog's paws after returning home every time/usually take your dog for a walk, but wash or wipe the dog's paws only on a rainy day or when the dog's paws are dirty/usually take your dog for a walk but do not wash or wipe the dog's paws/ do not take your dog for a walk]</p> |                                                                                                                                                                                                                                                                                                                                                                                                                                                                                                                                                                                                                                                                     |
| <p>Q3. How often has your dog exhibited the following behaviors within the past 3 months? Please select one of the following: 5 = always, 4 = usually, 3 = sometimes, 2 = rarely, 1 = never, or NA = unknown or not applicable. In addition, please select one of the following regarding how troubled you are by the behavior: 4 = very troubled, 3 = moderately troubled, 2 = not really troubled or 1 = never troubled.</p>                                                                                                                                                                                                                                                                                                                                                                                                                                                                                                                                                                                                                                                                                                                                                                                                                                                                                                                                                                                                                                                                                                                                                               |                                                                                                                                                                                                                                                                                                                                                                                                                                                                                                                                                                                                                                                                     |
| <p>1 Trying to eat non-food items</p> <p>2 Destroying household property (e.g., cushions and slippers) by chewing or digging</p> <p>3 Trying to chase or pounce on animals smaller than your dog</p> <p>4 Pulling on the leash while walking</p> <p>5 Sitting down and refusing to move while walking</p> <p>6 Barking when your dog hears noises (e.g., a doorbell, a ringtone, or the sound of a dish being dropped) inside the house</p> <p>7 Barking when unfamiliar people come into the house or garden</p> <p>8 Barking when your dog finds strange objects while walking</p> <p>9 Trying to attract your attention (e.g., nuzzling against you, putting its forepaw on you, or whining) if you are not looking at your dog</p> <p>10 Whining, barking, becoming restless, eliminating on inappropriate places, or exhibiting destructive behaviors before or while being separated from you</p> <p>11 Jumping on family members or strangers when your dog meets them</p> <p>12 Eliminating or marking with urine or feces on inappropriate places inside the house</p> <p>13 Exhibiting mounting behaviors, that is, thrusting its pelvis against toys, cushions, or people</p> <p>14 Chasing its tail</p> <p>15 Chasing its tail with barking, growling or biting at the tail</p> <p>16 Licking its body continuously or pulling at its own hair</p> <p>17 Staring at nothing or snapping at the air</p> <p>18 Staring at or trying to chase or pounce on lights or shadows</p>                                                                                                    | <p>Pica</p> <p>Destructive behavior</p> <p>Chasing or jumping on small animals</p> <p>Pulling on the leash</p> <p>Refusing to move while walking</p> <p>Barking at noises inside the house</p> <p>Barking at unfamiliar visitors</p> <p>Barking at strange objects while walking</p> <p>Attention-seeking behavior</p> <p>Separation anxiety</p> <p>Jumping on people when greeting</p> <p>Inappropriate elimination or marking</p> <p>Mounting behavior</p> <p>Tail chasing</p> <p>Tail chasing with barking, growling, or biting the tail</p> <p>Excessive self-grooming</p> <p>Staring or snapping at the air</p> <p>Staring at or chasing lights or shadows</p> |
| <p>Q4. How often has your dog shown signs of anxiety or fear (e.g., trembling, freezing, or hiding) in the following situations within the past 3 months? Please select one of the following: 5 = always, 4 = usually, 3 = sometimes, 2 = rarely, 1 = never, or NA = unknown or not applicable. In addition, please select one of following regarding how troubled you are by the behavior: 4 = very troubled, 3 = moderately troubled, 2 = not really troubled or 1 = never troubled.</p>                                                                                                                                                                                                                                                                                                                                                                                                                                                                                                                                                                                                                                                                                                                                                                                                                                                                                                                                                                                                                                                                                                   |                                                                                                                                                                                                                                                                                                                                                                                                                                                                                                                                                                                                                                                                     |
| <p>1 When unfamiliar people are approaching</p> <p>2 When unfamiliar dogs are approaching</p> <p>3 When hearing a loud noise (e.g., thunder or fireworks)</p> <p>4 When being on the examination table at a veterinary clinic</p>                                                                                                                                                                                                                                                                                                                                                                                                                                                                                                                                                                                                                                                                                                                                                                                                                                                                                                                                                                                                                                                                                                                                                                                                                                                                                                                                                            | <p>Fear of unfamiliar approaching people</p> <p>Fear of unfamiliar approaching dogs</p> <p>Fear of loud noises, such as thunder and/or fireworks</p> <p>Showing fear while on the examination table</p>                                                                                                                                                                                                                                                                                                                                                                                                                                                             |
| <p>Q5. How often has your dog barked, growled aggressively at or bitten the subjects below within the past 3 months? Please select one of the following: 5 = always, 4 = usually, 3 = sometimes, 2 = rarely, 1 = never, or NA = unknown or not applicable. In addition, please select one of the following regarding how troubled you are by the behavior; 4 = very troubled, 3 = moderately troubled, 2 = not really troubled or 1 = never troubled.</p>                                                                                                                                                                                                                                                                                                                                                                                                                                                                                                                                                                                                                                                                                                                                                                                                                                                                                                                                                                                                                                                                                                                                    |                                                                                                                                                                                                                                                                                                                                                                                                                                                                                                                                                                                                                                                                     |
| <p>1 Family members</p> <p>2 Unfamiliar people</p> <p>3 Unfamiliar dogs</p>                                                                                                                                                                                                                                                                                                                                                                                                                                                                                                                                                                                                                                                                                                                                                                                                                                                                                                                                                                                                                                                                                                                                                                                                                                                                                                                                                                                                                                                                                                                  | <p>Aggression toward family members</p> <p>Aggression toward unfamiliar people</p> <p>Aggression toward unfamiliar dogs</p>                                                                                                                                                                                                                                                                                                                                                                                                                                                                                                                                         |
| <p>Q6.<sup>d)</sup> If you are troubled by behaviors in your dog other than those listed above, please describe the behaviors.</p>                                                                                                                                                                                                                                                                                                                                                                                                                                                                                                                                                                                                                                                                                                                                                                                                                                                                                                                                                                                                                                                                                                                                                                                                                                                                                                                                                                                                                                                           |                                                                                                                                                                                                                                                                                                                                                                                                                                                                                                                                                                                                                                                                     |

Notes: "Expressions in the present study" was not shown in the questionnaire.

a) "House with garden" and "house without garden" are merged into the category "house".

b) Responses of "2" and "more than 2" were merged into the category of "yes" for the factor "presence of other dogs in the household".

c) "Adopted a stray dog", "adopted from an Internet forum", "adopted from a public animal shelter", and "adopted from a private organization" were merged into the "rescue" category. "Acquaintance" and "other" were merged into the "other sources" category.

d) This question was not used in the present study.

Table S2. Dogs participated in this study

| Breed                         | Number of dogs |
|-------------------------------|----------------|
| Shiba Inu                     | 297            |
| Toy Poodle                    | 250            |
| Miniature Dachshund           | 177            |
| Chihuahua                     | 142            |
| Other breeds                  | 278            |
| Mix                           | 69             |
| Labrador Retriever            | 63             |
| Papillon                      | 56             |
| Golden Retriever              | 55             |
| Shih Tzu                      | 53             |
| Pomeranian                    | 52             |
| Welsh Corgi                   | 49             |
| Miniature Schnauzer           | 46             |
| Yorkshire Terrier             | 39             |
| Maltese                       | 37             |
| Cavalier King Charles Spaniel | 37             |
| Jack Russell Terrier          | 29             |
| Border Collie                 | 27             |
| French Bulldog                | 26             |
| Shetland Sheepdog             | 25             |
| Beagle                        | 19             |
| Pug                           | 16             |
| West Highland White Terrier   | 15             |
| Miniature Pinscher            | 15             |
| Siberian Husky                | 14             |
| American Cocker Spaniel       | 12             |
| Bernese Mountain Dog          | 12             |
| Italian Greyhound             | 9              |
| Akita Inu                     | 8              |
| Kaninchen Dachshund           | 7              |
| German Shepherd Dog           | 7              |
| Pekingese                     | 6              |
| Bichon Frise                  | 6              |
| Kai Ken                       | 6              |
| Norfolk Terrier               | 6              |
| Japanese Spitz                | 5              |
| Bull dog                      | 4              |
| Cairn Terrier                 | 4              |
| Chin                          | 4              |
| Standard Dachshund            | 4              |
| Whippet                       | 4              |
| Boston Terrier                | 3              |
| Boxer                         | 3              |
| Brussels Griffon              | 3              |
| English setter                | 3              |
| Flat-coated Retriever         | 3              |
| Irish setter                  | 3              |
| Kooikerhondje                 | 3              |
| Miniature Poodle              | 3              |
| Rough Collie                  | 3              |
| Borzoi                        | 2              |
| English Cocker Spaniel        | 2              |
| Great Pyrenees                | 2              |
| Medium Poodle                 | 2              |
| Newfoundland                  | 2              |
| Old English Sheepdog          | 2              |
| Samoyed                       | 2              |
| Standard Poodle               | 2              |
| White Swiss Shepherd Dog      | 2              |
| Airedale Terrier              | 1              |
| Bearded Collie                | 1              |
| Belgian Shephrd Dog Tervueren | 1              |
| Brittany Spaniel              | 1              |
| Bull Terrier                  | 1              |
| Chinese Crested Dog           | 1              |
| Dalmatian                     | 1              |
| Gratedane                     | 1              |
| Irish wolfhound               | 1              |
| Kishu Inu                     | 1              |
| Lhasa Apso                    | 1              |
| Miniature Bull Terrier        | 1              |
| Polish Lowland Sheepdog       | 1              |
| Rottweiler                    | 1              |
| Schipperke                    | 1              |
| Shikoku Inu                   | 1              |
| Staffordshire Bull Terrier    | 1              |
| Tibetan Spaniel               | 1              |
| Toy Manchester Terrier        | 1              |
| Weimaraner                    | 1              |
| Welsh Terrier                 | 1              |

Table S3. Relations between 25 behaviors and dogs' general information

| Behavior                            | Number of dogs | Pseudo R <sup>2</sup> (McCadden) |                             | Estimate (B) | Standard Errors | Odds ratio (ExpB) | 99.8% CI for ExpB |       | P value  |  |
|-------------------------------------|----------------|----------------------------------|-----------------------------|--------------|-----------------|-------------------|-------------------|-------|----------|--|
|                                     |                |                                  | (Intercept)                 |              |                 |                   | Lower             | Upper |          |  |
| Pica                                | 2,041          | 0,08                             | Breed                       | 0.46         | 0.16            |                   |                   |       | 4.08E-03 |  |
|                                     |                |                                  | Other breeds                |              |                 | reference         |                   |       |          |  |
|                                     |                |                                  | Shiba Inu                   | -0.01        | 0.14            | 0.99              | 0.64              | 1.55  | 9.60E-01 |  |
|                                     |                |                                  | Toy Poodle                  | -0.23        | 0.15            | 0.80              | 0.50              | 1.28  | 1.39E-01 |  |
|                                     |                |                                  | Miniature Dachshund         | -0.21        | 0.17            | 0.81              | 0.48              | 1.37  | 2.10E-01 |  |
|                                     |                |                                  | Chihuahua                   | -0.41        | 0.19            | 0.66              | 0.37              | 1.19  | 3.06E-02 |  |
|                                     |                |                                  | Age                         |              |                 |                   |                   |       |          |  |
|                                     |                |                                  | Adult                       |              |                 | reference         |                   |       |          |  |
|                                     |                |                                  | Young                       | 1.86         | 0.29            | <b>6.41</b>       | 2.62              | 15.69 | 1.38E-10 |  |
|                                     |                |                                  | Senior                      | -0.71        | 0.12            | <i>0.49</i>       | 0.34              | 0.70  | 7.55E-10 |  |
|                                     |                |                                  | Geriatric                   | -0.99        | 0.12            | <i>0.37</i>       | 0.25              | 0.55  | 1.35E-15 |  |
|                                     |                |                                  | Other dogs in the household |              |                 |                   |                   |       |          |  |
|                                     |                |                                  | No                          |              |                 | reference         |                   |       |          |  |
|                                     |                |                                  | Yes                         | 0.10         | 0.11            | 1.10              | 0.79              | 1.54  | 3.64E-01 |  |
|                                     |                |                                  | Sex                         |              |                 |                   |                   |       |          |  |
|                                     |                |                                  | Female                      |              |                 | reference         |                   |       |          |  |
|                                     |                |                                  | Male                        | 0.05         | 0.10            | 1.05              | 0.78              | 1.41  | 6.17E-01 |  |
|                                     |                |                                  | Neutering status            |              |                 |                   |                   |       |          |  |
|                                     |                |                                  | Intact                      |              |                 | reference         |                   |       |          |  |
|                                     |                |                                  | Neutered                    | 0.39         | 0.12            | <b>1.48</b>       | 1.03              | 2.11  | 8.37E-04 |  |
|                                     |                |                                  | Source of acquisition       |              |                 |                   |                   |       |          |  |
| Breeder                             |                |                                  | reference                   |              |                 |                   |                   |       |          |  |
| Pet store                           | 0.13           | 0.11                             | 1.13                        | 0.79         | 1.62            | 2.75E-01          |                   |       |          |  |
| Rescue                              | -0.27          | 0.18                             | 0.76                        | 0.44         | 1.31            | 1.18E-01          |                   |       |          |  |
| Other sources                       | -0.02          | 0.17                             | 0.98                        | 0.59         | 1.63            | 8.96E-01          |                   |       |          |  |
| Type of residence                   |                |                                  |                             |              |                 |                   |                   |       |          |  |
| House                               |                |                                  | reference                   |              |                 |                   |                   |       |          |  |
| Apartment                           | 0.02           | 0.11                             | 1.02                        | 0.72         | 1.44            | 8.52E-01          |                   |       |          |  |
| Destructive behavior                | 2,040          | 0,12                             | (Intercept)                 | -0.21        | 0.16            |                   |                   |       | 2.01E-01 |  |
|                                     |                |                                  | Breed                       |              |                 |                   |                   |       |          |  |
|                                     |                |                                  | Other breeds                |              |                 | reference         |                   |       |          |  |
|                                     |                |                                  | Shiba Inu                   | 0.71         | 0.14            | <b>2.03</b>       | 1.30              | 3.16  | 8.17E-07 |  |
|                                     |                |                                  | Toy Poodle                  | 0.10         | 0.15            | 1.11              | 0.69              | 1.78  | 5.13E-01 |  |
|                                     |                |                                  | Miniature Dachshund         | 0.35         | 0.18            | 1.42              | 0.82              | 2.46  | 5.11E-02 |  |
|                                     |                |                                  | Chihuahua                   | -0.61        | 0.21            | 0.54              | 0.28              | 1.05  | 4.25E-03 |  |
|                                     |                |                                  | Age                         |              |                 |                   |                   |       |          |  |
|                                     |                |                                  | Adult                       |              |                 | reference         |                   |       |          |  |
|                                     |                |                                  | Young                       | 1.60         | 0.21            | <b>4.94</b>       | 2.61              | 9.34  | 1.04E-14 |  |
|                                     |                |                                  | Senior                      | -0.82        | 0.12            | <i>0.44</i>       | 0.31              | 0.63  | 2.91E-12 |  |
|                                     |                |                                  | Geriatric                   | -1.34        | 0.14            | <i>0.26</i>       | 0.17              | 0.40  | 4.76E-23 |  |
|                                     |                |                                  | Other dogs in the household |              |                 |                   |                   |       |          |  |
|                                     |                |                                  | No                          |              |                 | reference         |                   |       |          |  |
|                                     |                |                                  | Yes                         | -0.15        | 0.11            | 0.86              | 0.61              | 1.22  | 1.92E-01 |  |
|                                     |                |                                  | Sex                         |              |                 |                   |                   |       |          |  |
|                                     |                |                                  | Female                      |              |                 | reference         |                   |       |          |  |
|                                     |                |                                  | Male                        | 0.13         | 0.10            | 1.14              | 0.84              | 1.54  | 1.90E-01 |  |
|                                     |                |                                  | Neutering status            |              |                 |                   |                   |       |          |  |
|                                     |                |                                  | Intact                      |              |                 | reference         |                   |       |          |  |
|                                     |                |                                  | Neutered                    | 0.10         | 0.12            | 1.11              | 0.77              | 1.60  | 3.85E-01 |  |
| Source of acquisition               |                |                                  |                             |              |                 |                   |                   |       |          |  |
| Breeder                             |                |                                  | reference                   |              |                 |                   |                   |       |          |  |
| Pet store                           | 0.08           | 0.12                             | 1.08                        | 0.76         | 1.55            | 4.83E-01          |                   |       |          |  |
| Rescue                              | 0.11           | 0.18                             | 1.11                        | 0.63         | 1.95            | 5.55E-01          |                   |       |          |  |
| Other sources                       | 0.01           | 0.18                             | 1.01                        | 0.59         | 1.74            | 9.33E-01          |                   |       |          |  |
| Type of residence                   |                |                                  |                             |              |                 |                   |                   |       |          |  |
| House                               |                |                                  | reference                   |              |                 |                   |                   |       |          |  |
| Apartment                           | 0.04           | 0.11                             | 1.04                        | 0.73         | 1.48            | 7.49E-01          |                   |       |          |  |
| Chasing or jumping on small animals | 2,017          | 0,06                             | (Intercept)                 | 1.20         | 0.17            |                   |                   |       | 1.32E-12 |  |
|                                     |                |                                  | Breed                       |              |                 |                   |                   |       |          |  |
|                                     |                |                                  | Other breeds                |              |                 | reference         |                   |       |          |  |
|                                     |                |                                  | Shiba Inu                   | 0.40         | 0.16            | 1.49              | 0.91              | 2.45  | 1.20E-02 |  |
|                                     |                |                                  | Toy Poodle                  | -0.55        | 0.15            | <i>0.58</i>       | 0.36              | 0.92  | 2.78E-04 |  |
|                                     |                |                                  | Miniature Dachshund         | -0.43        | 0.17            | 0.65              | 0.38              | 1.11  | 1.28E-02 |  |
|                                     |                |                                  | Chihuahua                   | -0.93        | 0.19            | <i>0.39</i>       | 0.22              | 0.71  | 8.15E-07 |  |
|                                     |                |                                  | Age                         |              |                 |                   |                   |       |          |  |
|                                     |                |                                  | Adult                       |              |                 | reference         |                   |       |          |  |
|                                     |                |                                  | Young                       | -0.05        | 0.19            | 0.95              | 0.53              | 1.73  | 8.07E-01 |  |
|                                     |                |                                  | Senior                      | -0.48        | 0.13            | <i>0.62</i>       | 0.42              | 0.92  | 1.59E-04 |  |
|                                     |                |                                  | Geriatric                   | -1.12        | 0.13            | <i>0.33</i>       | 0.22              | 0.49  | 9.53E-18 |  |
|                                     |                |                                  | Other dogs in the household |              |                 |                   |                   |       |          |  |
|                                     |                |                                  | No                          |              |                 | reference         |                   |       |          |  |
|                                     |                |                                  | Yes                         | -0.23        | 0.11            | 0.79              | 0.56              | 1.12  | 3.62E-02 |  |
|                                     |                |                                  | Sex                         |              |                 |                   |                   |       |          |  |
|                                     |                |                                  | Female                      |              |                 | reference         |                   |       |          |  |
|                                     |                |                                  | Male                        | -0.03        | 0.10            | 0.97              | 0.71              | 1.33  | 7.87E-01 |  |
|                                     |                |                                  | Neutering status            |              |                 |                   |                   |       |          |  |
|                                     |                |                                  | Intact                      |              |                 | reference         |                   |       |          |  |
|                                     |                |                                  | Neutered                    | 0.22         | 0.12            | 1.25              | 0.86              | 1.80  | 6.58E-02 |  |
| Source of acquisition               |                |                                  |                             |              |                 |                   |                   |       |          |  |
| Breeder                             |                |                                  | reference                   |              |                 |                   |                   |       |          |  |
| Pet store                           | 0.00           | 0.12                             | 1.00                        | 0.69         | 1.44            | 1.00E+00          |                   |       |          |  |
| Rescue                              | 0.43           | 0.20                             | 1.54                        | 0.84         | 2.81            | 2.80E-02          |                   |       |          |  |
| Other sources                       | 0.11           | 0.17                             | 1.12                        | 0.66         | 1.91            | 5.12E-01          |                   |       |          |  |
| Type of residence                   |                |                                  |                             |              |                 |                   |                   |       |          |  |
| House                               |                |                                  | reference                   |              |                 |                   |                   |       |          |  |
| Apartment                           | -0.15          | 0.11                             | 0.86                        | 0.61         | 1.22            | 1.89E-01          |                   |       |          |  |

Table S3. Relations between 25 behaviors and dogs' general information (Continued)

| Behavior                           | Number of dogs | Pseudo R <sup>2</sup> (McFadden) |                             | Estimate (B) | Standard Errors | Odds ratio (ExpB) | 99.8% CI for ExpB |           | P value   |  |  |
|------------------------------------|----------------|----------------------------------|-----------------------------|--------------|-----------------|-------------------|-------------------|-----------|-----------|--|--|
|                                    |                |                                  |                             |              |                 |                   | Lower             | Upper     |           |  |  |
| Pulling on the leash               | 2,037          | 0.08                             | (Intercept)                 | 1.57         | 0.20            |                   |                   |           | 1.31E-15  |  |  |
|                                    |                |                                  | Breed                       |              |                 |                   |                   |           |           |  |  |
|                                    |                |                                  | Other breeds                |              |                 |                   |                   | reference |           |  |  |
|                                    |                |                                  | Shiba Inu                   | 0.25         | 0.18            | 1.29              | 0.73              | 2.26      | 1.65E-01  |  |  |
|                                    |                |                                  | Toy Poodle                  | -0.18        | 0.18            | 0.83              | 0.48              | 1.45      | 3.09E-01  |  |  |
|                                    |                |                                  | Miniature Dachshund         | -0.68        | 0.19            | 0.51              | 0.29              | 0.90      | 2.62E-04  |  |  |
|                                    |                |                                  | Chihuahua                   | -0.64        | 0.21            | 0.53              | 0.28              | 1.02      | 2.54E-03  |  |  |
|                                    |                |                                  | Age                         |              |                 |                   |                   |           |           |  |  |
|                                    |                |                                  | Adult                       |              |                 |                   |                   |           | reference |  |  |
|                                    |                |                                  | Young                       | 0.24         | 0.25            | 1.28              | 0.59              | 2.77      | 3.33E-01  |  |  |
|                                    |                |                                  | Senior                      | -0.32        | 0.15            | 0.73              | 0.45              | 1.16      | 3.39E-02  |  |  |
|                                    |                |                                  | Geriatric                   | -1.37        | 0.14            | 0.25              | 0.16              | 0.40      | 2.53E-21  |  |  |
|                                    |                |                                  | Other dogs in the household |              |                 |                   |                   |           |           |  |  |
|                                    |                |                                  | No                          |              |                 |                   |                   |           | reference |  |  |
|                                    |                |                                  | Yes                         | -0.25        | 0.13            | 0.78              | 0.53              | 1.14      | 4.27E-02  |  |  |
|                                    |                |                                  | Sex                         |              |                 |                   |                   |           |           |  |  |
|                                    |                |                                  | Female                      |              |                 |                   |                   |           | reference |  |  |
|                                    |                |                                  | Male                        | 0.34         | 0.12            | 1.40              | 0.98              | 2.00      | 3.96E-03  |  |  |
|                                    |                |                                  | Neutering status            |              |                 |                   |                   |           |           |  |  |
|                                    |                |                                  | Intact                      |              |                 |                   |                   |           | reference |  |  |
|                                    |                |                                  | Neutered                    | 0.07         | 0.14            | 1.07              | 0.69              | 1.64      | 6.38E-01  |  |  |
|                                    |                |                                  | Source of acquisition       |              |                 |                   |                   |           |           |  |  |
|                                    |                |                                  | Breeder                     |              |                 |                   |                   |           | reference |  |  |
| Pet store                          | 0.19           | 0.13                             | 1.21                        | 0.80         | 1.83            | 1.61E-01          |                   |           |           |  |  |
| Rescue                             | 0.56           | 0.23                             | 1.75                        | 0.87         | 3.51            | 1.37E-02          |                   |           |           |  |  |
| Other sources                      | 0.32           | 0.20                             | 1.37                        | 0.75         | 2.52            | 1.04E-01          |                   |           |           |  |  |
| Type of residence                  |                |                                  |                             |              |                 |                   |                   |           |           |  |  |
| House                              |                |                                  |                             |              |                 | reference         |                   |           |           |  |  |
| Apartment                          | 0.11           | 0.13                             | 1.11                        | 0.74         | 1.69            | 4.18E-01          |                   |           |           |  |  |
| Refusing to move while walking     | 2,034          | 0.02                             | (Intercept)                 | -0.22        | 0.15            |                   |                   |           | 1.50E-01  |  |  |
|                                    |                |                                  | Breed                       |              |                 |                   |                   |           |           |  |  |
|                                    |                |                                  | Other breeds                |              |                 |                   |                   |           | reference |  |  |
|                                    |                |                                  | Shiba Inu                   | 0.43         | 0.14            | 1.54              | 1.02              | 2.35      | 1.35E-03  |  |  |
|                                    |                |                                  | Toy Poodle                  | 0.06         | 0.14            | 1.07              | 0.69              | 1.66      | 6.53E-01  |  |  |
|                                    |                |                                  | Miniature Dachshund         | 0.56         | 0.17            | 1.75              | 1.04              | 2.96      | 9.29E-04  |  |  |
|                                    |                |                                  | Chihuahua                   | 0.01         | 0.18            | 1.01              | 0.57              | 1.78      | 9.66E-01  |  |  |
|                                    |                |                                  | Age                         |              |                 |                   |                   |           |           |  |  |
|                                    |                |                                  | Adult                       |              |                 |                   |                   |           | reference |  |  |
|                                    |                |                                  | Young                       | -0.10        | 0.16            | 0.91              | 0.55              | 1.50      | 5.44E-01  |  |  |
|                                    |                |                                  | Senior                      | 0.02         | 0.11            | 1.02              | 0.72              | 1.44      | 8.75E-01  |  |  |
|                                    |                |                                  | Geriatric                   | -0.29        | 0.12            | 0.75              | 0.52              | 1.09      | 1.72E-02  |  |  |
|                                    |                |                                  | Other dogs in the household |              |                 |                   |                   |           |           |  |  |
|                                    |                |                                  | No                          |              |                 |                   |                   |           | reference |  |  |
|                                    |                |                                  | Yes                         | -0.41        | 0.10            | 0.67              | 0.48              | 0.92      | 8.44E-05  |  |  |
|                                    |                |                                  | Sex                         |              |                 |                   |                   |           |           |  |  |
|                                    |                |                                  | Female                      |              |                 |                   |                   |           | reference |  |  |
|                                    |                |                                  | Male                        | 0.07         | 0.09            | 1.07              | 0.81              | 1.42      | 4.54E-01  |  |  |
|                                    |                |                                  | Neutering status            |              |                 |                   |                   |           |           |  |  |
|                                    |                |                                  | Intact                      |              |                 |                   |                   |           | reference |  |  |
|                                    |                |                                  | Neutered                    | 0.26         | 0.11            | 1.30              | 0.92              | 1.82      | 1.83E-02  |  |  |
|                                    |                |                                  | Source of acquisition       |              |                 |                   |                   |           |           |  |  |
|                                    |                |                                  | Breeder                     |              |                 |                   |                   |           | reference |  |  |
| Pet store                          | 0.10           | 0.11                             | 1.11                        | 0.80         | 1.54            | 3.41E-01          |                   |           |           |  |  |
| Rescue                             | -0.18          | 0.17                             | 0.84                        | 0.50         | 1.41            | 2.90E-01          |                   |           |           |  |  |
| Other sources                      | -0.18          | 0.16                             | 0.83                        | 0.51         | 1.37            | 2.59E-01          |                   |           |           |  |  |
| Type of residence                  |                |                                  |                             |              |                 |                   |                   |           |           |  |  |
| House                              |                |                                  |                             |              |                 | reference         |                   |           |           |  |  |
| Apartment                          | 0.04           | 0.11                             | 1.04                        | 0.75         | 1.44            | 7.14E-01          |                   |           |           |  |  |
| Barking at noises inside the house | 2,040          | 0.07                             | (Intercept)                 | 1.01         | 0.18            |                   |                   |           | 8.28E-09  |  |  |
|                                    |                |                                  | Breed                       |              |                 |                   |                   |           |           |  |  |
|                                    |                |                                  | Other breeds                |              |                 |                   |                   |           | reference |  |  |
|                                    |                |                                  | Shiba Inu                   | -0.80        | 0.14            | 0.45              | 0.29              | 0.69      | 8.42E-09  |  |  |
|                                    |                |                                  | Toy Poodle                  | 1.23         | 0.22            | 3.43              | 1.75              | 6.71      | 1.52E-08  |  |  |
|                                    |                |                                  | Miniature Dachshund         | 0.72         | 0.21            | 2.06              | 1.06              | 4.00      | 7.62E-04  |  |  |
|                                    |                |                                  | Chihuahua                   | 0.40         | 0.22            | 1.49              | 0.75              | 2.97      | 7.42E-02  |  |  |
|                                    |                |                                  | Age                         |              |                 |                   |                   |           |           |  |  |
|                                    |                |                                  | Adult                       |              |                 |                   |                   |           | reference |  |  |
|                                    |                |                                  | Young                       | -0.74        | 0.18            | 0.48              | 0.28              | 0.83      | 3.41E-05  |  |  |
|                                    |                |                                  | Senior                      | -0.07        | 0.13            | 0.93              | 0.62              | 1.41      | 6.03E-01  |  |  |
|                                    |                |                                  | Geriatric                   | -0.68        | 0.14            | 0.50              | 0.33              | 0.77      | 4.47E-07  |  |  |
|                                    |                |                                  | Other dogs in the household |              |                 |                   |                   |           |           |  |  |
|                                    |                |                                  | No                          |              |                 |                   |                   |           | reference |  |  |
|                                    |                |                                  | Yes                         | 0.28         | 0.12            | 1.33              | 0.91              | 1.93      | 1.98E-02  |  |  |
|                                    |                |                                  | Sex                         |              |                 |                   |                   |           |           |  |  |
|                                    |                |                                  | Female                      |              |                 |                   |                   |           | reference |  |  |
|                                    |                |                                  | Male                        | 0.18         | 0.10            | 1.20              | 0.87              | 1.66      | 8.03E-02  |  |  |
|                                    |                |                                  | Neutering status            |              |                 |                   |                   |           |           |  |  |
|                                    |                |                                  | Intact                      |              |                 |                   |                   |           | reference |  |  |
|                                    |                |                                  | Neutered                    | -0.11        | 0.13            | 0.90              | 0.60              | 1.33      | 3.99E-01  |  |  |
|                                    |                |                                  | Source of acquisition       |              |                 |                   |                   |           |           |  |  |
|                                    |                |                                  | Breeder                     |              |                 |                   |                   |           | reference |  |  |
| Pet store                          | 0.27           | 0.12                             | 1.31                        | 0.89         | 1.91            | 2.98E-02          |                   |           |           |  |  |
| Rescue                             | -0.45          | 0.18                             | 0.64                        | 0.37         | 1.11            | 1.25E-02          |                   |           |           |  |  |
| Other sources                      | 0.01           | 0.18                             | 1.01                        | 0.58         | 1.76            | 9.65E-01          |                   |           |           |  |  |
| Type of residence                  |                |                                  |                             |              |                 |                   |                   |           |           |  |  |
| House                              |                |                                  |                             |              |                 | reference         |                   |           |           |  |  |
| Apartment                          | -0.05          | 0.12                             | 0.95                        | 0.65         | 1.39            | 6.91E-01          |                   |           |           |  |  |

Table S3. Relations between 25 behaviors and dogs' general information (Continued)

| Behavior                                 | Number of dogs    | Pseudo R <sup>2</sup> (McFadden) |       |                             | Estimate (B) | Standard Errors | Odds ratio (ExpB) | 99.8% CI for ExpB |             | P value    |      |          |
|------------------------------------------|-------------------|----------------------------------|-------|-----------------------------|--------------|-----------------|-------------------|-------------------|-------------|------------|------|----------|
|                                          |                   |                                  |       | (Intercept)                 |              |                 |                   | Lower             | Upper       |            |      |          |
| Barking at unfamiliar visitors           | 2,022             | 0.04                             |       | (Intercept)                 | 1.21         | 0.18            |                   |                   |             | 2.76E-11   |      |          |
|                                          |                   |                                  | Breed |                             |              |                 |                   |                   |             |            |      |          |
|                                          |                   |                                  |       | Other breeds                |              |                 |                   |                   | reference   |            |      |          |
|                                          |                   |                                  |       | Shiba Inu                   |              |                 | -0.19             | 0.15              | 0.83        | 0.52       | 1.31 | 2.05E-01 |
|                                          |                   |                                  |       | Toy Poodle                  |              |                 | 0.68              | 0.19              | <b>1.97</b> | 1.10       | 3.53 | 3.04E-04 |
|                                          |                   |                                  |       | Miniature Dachshund         |              |                 | 0.92              | 0.24              | <b>2.50</b> | 1.21       | 5.18 | 9.86E-05 |
|                                          |                   |                                  |       | Chihuahua                   |              |                 | 1.11              | 0.28              | <b>3.04</b> | 1.29       | 7.19 | 6.60E-05 |
|                                          |                   |                                  |       | Age                         |              |                 |                   |                   |             |            |      |          |
|                                          |                   |                                  |       | Adult                       |              |                 |                   |                   | reference   |            |      |          |
|                                          |                   |                                  |       | Young                       |              |                 | -0.60             | 0.18              | <i>0.55</i> | 0.31       | 0.96 | 8.97E-04 |
|                                          |                   |                                  |       | Senior                      |              |                 | -0.01             | 0.14              | 0.99        | 0.64       | 1.51 | 9.16E-01 |
|                                          |                   |                                  |       | Geriatric                   |              |                 | -0.45             | 0.14              | <i>0.64</i> | 0.41       | 0.99 | 1.40E-03 |
|                                          |                   |                                  |       | Other dogs in the household |              |                 |                   |                   |             |            |      |          |
|                                          |                   |                                  |       | No                          |              |                 |                   |                   | reference   |            |      |          |
|                                          |                   |                                  |       | Yes                         |              |                 | 0.26              | 0.13              | 1.29        | 0.87       | 1.91 | 4.28E-02 |
|                                          |                   |                                  |       | Sex                         |              |                 |                   |                   |             |            |      |          |
|                                          |                   |                                  |       | Female                      |              |                 |                   |                   | reference   |            |      |          |
|                                          |                   |                                  |       | Male                        |              |                 | 0.13              | 0.11              | 1.13        | 0.81       | 1.59 | 2.46E-01 |
|                                          |                   |                                  |       | Neutering status            |              |                 |                   |                   |             |            |      |          |
|                                          |                   |                                  |       | Intact                      |              |                 |                   |                   | reference   |            |      |          |
|                                          |                   |                                  |       | Neutered                    |              |                 | -0.01             | 0.13              | 0.99        | 0.66       | 1.49 | 9.39E-01 |
|                                          |                   |                                  |       | Source of acquisition       |              |                 |                   |                   |             |            |      |          |
|                                          |                   |                                  |       | Breeder                     |              |                 |                   |                   | reference   |            |      |          |
|                                          | Pet store         |                                  |       | -0.01                       | 0.13         | 0.99            | 0.66              | 1.46              | 9.13E-01    |            |      |          |
|                                          | Rescue            |                                  |       | -0.24                       | 0.19         | 0.78            | 0.43              | 1.41              | 2.00E-01    |            |      |          |
|                                          | Other sources     |                                  |       | 0.20                        | 0.20         | 1.22            | 0.66              | 2.26              | 3.23E-01    |            |      |          |
|                                          | Type of residence |                                  |       |                             |              |                 |                   |                   |             |            |      |          |
|                                          | House             |                                  |       |                             |              | reference       |                   |                   |             |            |      |          |
|                                          | Apartment         |                                  |       | -0.49                       | 0.12         | <i>0.61</i>     | 0.42              | 0.89              | 5.25E-05    |            |      |          |
| Barking at strange objects while walking | 2,033             | 0.02                             |       | (Intercept)                 | -0.15        | 0.15            |                   |                   |             | 3.12E-01   |      |          |
|                                          |                   |                                  | Breed |                             |              |                 |                   |                   |             |            |      |          |
|                                          |                   |                                  |       | Other breeds                |              |                 |                   |                   | reference   |            |      |          |
|                                          |                   |                                  |       | Shiba Inu                   |              |                 | 0.02              | 0.13              | 1.02        | 0.67       | 1.55 | 8.66E-01 |
|                                          |                   |                                  |       | Toy Poodle                  |              |                 | 0.54              | 0.14              | <b>1.71</b> | 1.10       | 2.67 | 1.85E-04 |
|                                          |                   |                                  |       | Miniature Dachshund         |              |                 | 0.28              | 0.17              | 1.32        | 0.79       | 2.21 | 9.92E-02 |
|                                          |                   |                                  |       | Chihuahua                   |              |                 | 0.16              | 0.18              | 1.17        | 0.67       | 2.06 | 3.82E-01 |
|                                          |                   |                                  |       | Age                         |              |                 |                   |                   |             |            |      |          |
|                                          |                   |                                  |       | Adult                       |              |                 |                   |                   | reference   |            |      |          |
|                                          |                   |                                  |       | Young                       |              |                 | -0.51             | 0.17              | 0.60        | 0.36       | 1.00 | 2.18E-03 |
|                                          |                   |                                  |       | Senior                      |              |                 | -0.15             | 0.11              | 0.86        | 0.61       | 1.22 | 1.88E-01 |
|                                          |                   |                                  |       | Geriatric                   |              |                 | -0.42             | 0.12              | <i>0.65</i> | 0.45       | 0.95 | 4.93E-04 |
|                                          |                   |                                  |       | Other dogs in the household |              |                 |                   |                   |             |            |      |          |
|                                          |                   |                                  |       | No                          |              |                 |                   |                   | reference   |            |      |          |
|                                          |                   |                                  |       | Yes                         |              |                 | 0.21              | 0.10              | 1.24        | 0.90       | 1.70 | 4.03E-02 |
|                                          |                   |                                  |       | Sex                         |              |                 |                   |                   |             |            |      |          |
|                                          |                   |                                  |       | Female                      |              |                 |                   |                   | reference   |            |      |          |
|                                          |                   |                                  |       | Male                        |              |                 | -0.01             | 0.09              | 0.99        | 0.74       | 1.31 | 8.90E-01 |
|                                          |                   |                                  |       | Neutering status            |              |                 |                   |                   |             |            |      |          |
|                                          |                   |                                  |       | Intact                      |              |                 |                   |                   | reference   |            |      |          |
|                                          |                   |                                  |       | Neutered                    |              |                 | 0.00              | 0.11              | 1.00        | 0.71       | 1.40 | 9.85E-01 |
|                                          |                   |                                  |       | Source of acquisition       |              |                 |                   |                   |             |            |      |          |
|                                          |                   |                                  |       | Breeder                     |              |                 |                   |                   | reference   |            |      |          |
|                                          | Pet store         |                                  |       | 0.14                        | 0.11         | 1.16            | 0.83              | 1.61              | 1.79E-01    |            |      |          |
|                                          | Rescue            |                                  |       | -0.34                       | 0.17         | 0.71            | 0.42              | 1.22              | 5.27E-02    |            |      |          |
|                                          | Other sources     |                                  |       | 0.21                        | 0.16         | 1.23            | 0.75              | 2.01              | 1.97E-01    |            |      |          |
|                                          | Type of residence |                                  |       |                             |              |                 |                   |                   |             |            |      |          |
|                                          | House             |                                  |       |                             |              | reference       |                   |                   |             |            |      |          |
|                                          | Apartment         |                                  |       | -0.18                       | 0.11         | 0.84            | 0.60              | 1.16              | 9.38E-02    |            |      |          |
| Attention-seeking behavior               | 2,040             | 0.03                             |       | (Intercept)                 | 1.83         | 0.21            |                   |                   |             | < 2.00E-16 |      |          |
|                                          |                   |                                  | Breed |                             |              |                 |                   |                   |             |            |      |          |
|                                          |                   |                                  |       | Other breeds                |              |                 |                   |                   | reference   |            |      |          |
|                                          |                   |                                  |       | Shiba Inu                   |              |                 | -0.33             | 0.17              | 0.72        | 0.43       | 1.20 | 4.76E-02 |
|                                          |                   |                                  |       | Toy Poodle                  |              |                 | 1.02              | 0.27              | <b>2.77</b> | 1.19       | 6.43 | 1.89E-04 |
|                                          |                   |                                  |       | Miniature Dachshund         |              |                 | 0.84              | 0.29              | 2.31        | 0.95       | 5.58 | 3.50E-03 |
|                                          |                   |                                  |       | Chihuahua                   |              |                 | -0.14             | 0.24              | 0.87        | 0.41       | 1.81 | 5.45E-01 |
|                                          |                   |                                  |       | Age                         |              |                 |                   |                   |             |            |      |          |
|                                          |                   |                                  |       | Adult                       |              |                 |                   |                   | reference   |            |      |          |
|                                          |                   |                                  |       | Young                       |              |                 | 0.18              | 0.25              | 1.19        | 0.55       | 2.61 | 4.82E-01 |
|                                          |                   |                                  |       | Senior                      |              |                 | -0.32             | 0.16              | 0.73        | 0.45       | 1.18 | 4.16E-02 |
|                                          |                   |                                  |       | Geriatric                   |              |                 | -0.57             | 0.16              | <i>0.57</i> | 0.34       | 0.93 | 4.36E-04 |
|                                          |                   |                                  |       | Other dogs in the household |              |                 |                   |                   |             |            |      |          |
|                                          |                   |                                  |       | No                          |              |                 |                   |                   | reference   |            |      |          |
|                                          |                   |                                  |       | Yes                         |              |                 | -0.04             | 0.14              | 0.96        | 0.62       | 1.48 | 7.74E-01 |
|                                          |                   |                                  |       | Sex                         |              |                 |                   |                   |             |            |      |          |
|                                          |                   |                                  |       | Female                      |              |                 |                   |                   | reference   |            |      |          |
|                                          |                   |                                  |       | Male                        |              |                 | -0.10             | 0.13              | 0.90        | 0.61       | 1.33 | 4.09E-01 |
|                                          |                   |                                  |       | Neutering status            |              |                 |                   |                   |             |            |      |          |
|                                          |                   |                                  |       | Intact                      |              |                 |                   |                   | reference   |            |      |          |
|                                          |                   |                                  |       | Neutered                    |              |                 | -0.02             | 0.15              | 0.98        | 0.61       | 1.57 | 8.85E-01 |
|                                          |                   |                                  |       | Source of acquisition       |              |                 |                   |                   |             |            |      |          |
|                                          |                   |                                  |       | Breeder                     |              |                 |                   |                   | reference   |            |      |          |
|                                          | Pet store         |                                  |       | 0.16                        | 0.15         | 1.18            | 0.75              | 1.86              | 2.68E-01    |            |      |          |
|                                          | Rescue            |                                  |       | -0.17                       | 0.22         | 0.84            | 0.43              | 1.64              | 4.34E-01    |            |      |          |
|                                          | Other sources     |                                  |       | 0.25                        | 0.22         | 1.29            | 0.64              | 2.57              | 2.63E-01    |            |      |          |
|                                          | Type of residence |                                  |       |                             |              |                 |                   |                   |             |            |      |          |
|                                          | House             |                                  |       |                             |              | reference       |                   |                   |             |            |      |          |
|                                          | Apartment         |                                  |       | 0.09                        | 0.15         | 1.09            | 0.68              | 1.74              | 5.66E-01    |            |      |          |

Table S3. Relations between 25 behaviors and dogs' general information (Continued)

| Behavior                             | Number of dogs | Pseudo R <sup>2</sup> (McFadden) |                             |       | Estimate (B) | Standard Errors | Odds ratio (ExpB) | 99.8% CI for ExpB |             | P value  |      |          |
|--------------------------------------|----------------|----------------------------------|-----------------------------|-------|--------------|-----------------|-------------------|-------------------|-------------|----------|------|----------|
|                                      |                |                                  | (Intercept)                 |       |              |                 |                   | Lower             | Upper       |          |      |          |
| Separation anxiety                   | 2,008          | 0.04                             | (Intercept)                 |       | -0.29        | 0.16            |                   |                   |             | 6.24E-02 |      |          |
|                                      |                |                                  | Breed                       |       |              |                 |                   |                   |             |          |      |          |
|                                      |                |                                  | Other breeds                |       |              |                 |                   |                   | reference   |          |      |          |
|                                      |                |                                  | Shiba Inu                   |       |              |                 | -0.45             | 0.15              | 0.64        | 0.40     | 1.01 | 2.55E-03 |
|                                      |                |                                  | Toy Poodle                  |       |              |                 | 0.29              | 0.15              | 1.34        | 0.85     | 2.10 | 4.61E-02 |
|                                      |                |                                  | Miniature Dachshund         |       |              |                 | 0.75              | 0.17              | <b>2.12</b> | 1.26     | 3.57 | 8.11E-06 |
|                                      |                |                                  | Chihuahua                   |       |              |                 | -0.38             | 0.20              | 0.68        | 0.37     | 1.26 | 5.43E-02 |
|                                      |                |                                  | Age                         |       |              |                 |                   |                   |             |          |      |          |
|                                      |                |                                  | Adult                       |       |              |                 |                   |                   | reference   |          |      |          |
|                                      |                |                                  | Young                       |       |              |                 | 0.46              | 0.17              | 1.59        | 0.95     | 2.66 | 5.11E-03 |
|                                      |                |                                  | Senior                      |       |              |                 | -0.27             | 0.12              | 0.77        | 0.53     | 1.11 | 2.51E-02 |
|                                      |                |                                  | Geriatric                   |       |              |                 | -0.07             | 0.13              | 0.93        | 0.63     | 1.37 | 5.68E-01 |
|                                      |                |                                  | Other dogs in the household |       |              |                 |                   |                   |             |          |      |          |
|                                      |                |                                  | No                          |       |              |                 |                   |                   | reference   |          |      |          |
|                                      |                |                                  | Yes                         |       |              |                 | 0.19              | 0.11              | 1.21        | 0.87     | 1.68 | 7.71E-02 |
|                                      |                |                                  | Sex                         |       |              |                 |                   |                   |             |          |      |          |
|                                      |                |                                  | Female                      |       |              |                 |                   |                   | reference   |          |      |          |
|                                      |                |                                  | Male                        |       |              |                 | 0.28              | 0.09              | 1.33        | 0.99     | 1.78 | 2.96E-03 |
|                                      |                |                                  | Neutering status            |       |              |                 |                   |                   |             |          |      |          |
|                                      |                |                                  | Intact                      |       |              |                 |                   |                   | reference   |          |      |          |
| Neutered                             |                |                                  |                             | -0.46 | 0.11         | <i>0.63</i>     | 0.44              | 0.89              | 3.36E-05    |          |      |          |
| Source of acquisition                |                |                                  |                             |       |              |                 |                   |                   |             |          |      |          |
| Breeder                              |                |                                  |                             |       |              | reference       |                   |                   |             |          |      |          |
| Pet store                            |                |                                  |                             | -0.02 | 0.11         | 0.98            | 0.69              | 1.39              | 8.67E-01    |          |      |          |
| Rescue                               |                |                                  |                             | 0.10  | 0.17         | 1.10            | 0.64              | 1.89              | 5.69E-01    |          |      |          |
| Other sources                        |                |                                  |                             | 0.05  | 0.17         | 1.05            | 0.63              | 1.74              | 7.81E-01    |          |      |          |
| Type of residence                    |                |                                  |                             |       |              |                 |                   |                   |             |          |      |          |
| House                                |                |                                  |                             |       |              | reference       |                   |                   |             |          |      |          |
| Apartment                            |                |                                  |                             | 0.03  | 0.11         | 1.03            | 0.73              | 1.45              | 7.88E-01    |          |      |          |
| Jumping on people when greeting      | 2,043          | 0.08                             | (Intercept)                 |       | 1.04         | 0.17            |                   |                   |             | 4.88E-10 |      |          |
|                                      |                |                                  | Breed                       |       |              |                 |                   |                   |             |          |      |          |
|                                      |                |                                  | Other breeds                |       |              |                 |                   |                   | reference   |          |      |          |
|                                      |                |                                  | Shiba Inu                   |       |              |                 | -0.21             | 0.14              | 0.81        | 0.52     | 1.26 | 1.38E-01 |
|                                      |                |                                  | Toy Poodle                  |       |              |                 | 0.11              | 0.16              | 1.11        | 0.68     | 1.83 | 5.01E-01 |
|                                      |                |                                  | Miniature Dachshund         |       |              |                 | 0.05              | 0.18              | 1.06        | 0.61     | 1.83 | 7.63E-01 |
|                                      |                |                                  | Chihuahua                   |       |              |                 | -1.04             | 0.19              | <i>0.35</i> | 0.20     | 0.63 | 3.76E-08 |
|                                      |                |                                  | Age                         |       |              |                 |                   |                   |             |          |      |          |
|                                      |                |                                  | Adult                       |       |              |                 |                   |                   | reference   |          |      |          |
|                                      |                |                                  | Young                       |       |              |                 | 0.64              | 0.21              | 1.91        | 0.98     | 3.70 | 2.70E-03 |
|                                      |                |                                  | Senior                      |       |              |                 | -0.44             | 0.12              | <i>0.64</i> | 0.44     | 0.94 | 2.77E-04 |
|                                      |                |                                  | Geriatric                   |       |              |                 | -1.32             | 0.13              | <i>0.27</i> | 0.18     | 0.40 | 3.30E-25 |
|                                      |                |                                  | Other dogs in the household |       |              |                 |                   |                   |             |          |      |          |
|                                      |                |                                  | No                          |       |              |                 |                   |                   | reference   |          |      |          |
|                                      |                |                                  | Yes                         |       |              |                 | -0.09             | 0.11              | 0.91        | 0.65     | 1.28 | 4.06E-01 |
|                                      |                |                                  | Sex                         |       |              |                 |                   |                   |             |          |      |          |
|                                      |                |                                  | Female                      |       |              |                 |                   |                   | reference   |          |      |          |
|                                      |                |                                  | Male                        |       |              |                 | 0.17              | 0.10              | 1.19        | 0.88     | 1.61 | 8.00E-02 |
|                                      |                |                                  | Neutering status            |       |              |                 |                   |                   |             |          |      |          |
|                                      |                |                                  | Intact                      |       |              |                 |                   |                   | reference   |          |      |          |
| Neutered                             |                |                                  |                             | -0.10 | 0.12         | 0.90            | 0.62              | 1.31              | 3.92E-01    |          |      |          |
| Source of acquisition                |                |                                  |                             |       |              |                 |                   |                   |             |          |      |          |
| Breeder                              |                |                                  |                             |       |              | reference       |                   |                   |             |          |      |          |
| Pet store                            |                |                                  |                             | 0.21  | 0.12         | 1.23            | 0.86              | 1.77              | 7.13E-02    |          |      |          |
| Rescue                               |                |                                  |                             | -0.17 | 0.18         | 0.85            | 0.49              | 1.46              | 3.44E-01    |          |      |          |
| Other sources                        |                |                                  |                             | 0.01  | 0.17         | 1.02            | 0.60              | 1.71              | 9.30E-01    |          |      |          |
| Type of residence                    |                |                                  |                             |       |              |                 |                   |                   |             |          |      |          |
| House                                |                |                                  |                             |       |              | reference       |                   |                   |             |          |      |          |
| Apartment                            |                |                                  |                             | 0.02  | 0.11         | 1.02            | 0.72              | 1.46              | 8.50E-01    |          |      |          |
| Inappropriate elimination or marking | 2,035          | 0.05                             | (Intercept)                 |       | -0.63        | 0.16            |                   |                   |             | 6.66E-05 |      |          |
|                                      |                |                                  | Breed                       |       |              |                 |                   |                   |             |          |      |          |
|                                      |                |                                  | Other breeds                |       |              |                 |                   |                   | reference   |          |      |          |
|                                      |                |                                  | Shiba Inu                   |       |              |                 | -0.58             | 0.15              | <i>0.56</i> | 0.35     | 0.89 | 1.20E-04 |
|                                      |                |                                  | Toy Poodle                  |       |              |                 | 0.53              | 0.14              | <b>1.69</b> | 1.08     | 2.65 | 2.72E-04 |
|                                      |                |                                  | Miniature Dachshund         |       |              |                 | 0.79              | 0.17              | <b>2.21</b> | 1.30     | 3.74 | 3.57E-06 |
|                                      |                |                                  | Chihuahua                   |       |              |                 | 0.32              | 0.18              | 1.38        | 0.78     | 2.44 | 7.90E-02 |
|                                      |                |                                  | Age                         |       |              |                 |                   |                   |             |          |      |          |
|                                      |                |                                  | Adult                       |       |              |                 |                   |                   | reference   |          |      |          |
|                                      |                |                                  | Young                       |       |              |                 | 0.74              | 0.17              | <b>2.09</b> | 1.25     | 3.48 | 8.65E-06 |
|                                      |                |                                  | Senior                      |       |              |                 | -0.07             | 0.12              | 0.93        | 0.64     | 1.34 | 5.39E-01 |
|                                      |                |                                  | Geriatric                   |       |              |                 | 0.57              | 0.12              | <b>1.76</b> | 1.20     | 2.59 | 5.06E-06 |
|                                      |                |                                  | Other dogs in the household |       |              |                 |                   |                   |             |          |      |          |
|                                      |                |                                  | No                          |       |              |                 |                   |                   | reference   |          |      |          |
|                                      |                |                                  | Yes                         |       |              |                 | 0.27              | 0.11              | 1.31        | 0.94     | 1.81 | 1.14E-02 |
|                                      |                |                                  | Sex                         |       |              |                 |                   |                   |             |          |      |          |
|                                      |                |                                  | Female                      |       |              |                 |                   |                   | reference   |          |      |          |
|                                      |                |                                  | Male                        |       |              |                 | 0.20              | 0.09              | 1.22        | 0.91     | 1.64 | 3.31E-02 |
|                                      |                |                                  | Neutering status            |       |              |                 |                   |                   |             |          |      |          |
|                                      |                |                                  | Intact                      |       |              |                 |                   |                   | reference   |          |      |          |
| Neutered                             |                |                                  |                             | -0.37 | 0.11         | <i>0.69</i>     | 0.49              | 0.98              | 9.42E-04    |          |      |          |
| Source of acquisition                |                |                                  |                             |       |              |                 |                   |                   |             |          |      |          |
| Breeder                              |                |                                  |                             |       |              | reference       |                   |                   |             |          |      |          |
| Pet store                            |                |                                  |                             | 0.10  | 0.11         | 1.10            | 0.78              | 1.56              | 3.85E-01    |          |      |          |
| Rescue                               |                |                                  |                             | -0.08 | 0.18         | 0.92            | 0.53              | 1.60              | 6.56E-01    |          |      |          |
| Other sources                        |                |                                  |                             | 0.01  | 0.17         | 1.01            | 0.61              | 1.69              | 9.45E-01    |          |      |          |
| Type of residence                    |                |                                  |                             |       |              |                 |                   |                   |             |          |      |          |
| House                                |                |                                  |                             |       |              | reference       |                   |                   |             |          |      |          |
| Apartment                            |                |                                  |                             | 0.16  | 0.11         | 1.18            | 0.84              | 1.65              | 1.33E-01    |          |      |          |

Table S3. Relations between 25 behaviors and dogs' general information (Continued)

| Behavior                                                | Number of dogs        | Pseudo R <sup>2</sup> (McFadden) |             |                             | Estimate (B) | Standard Errors | Odds ratio (ExpB) | 99.8% CI for ExpB |             | P value    |      |          |
|---------------------------------------------------------|-----------------------|----------------------------------|-------------|-----------------------------|--------------|-----------------|-------------------|-------------------|-------------|------------|------|----------|
|                                                         |                       |                                  | (Intercept) |                             |              |                 |                   | Lower             | Upper       |            |      |          |
| Mounting behavior                                       | 2,045                 | 0.07                             | (Intercept) |                             | -0.18        | 0.16            |                   |                   |             | 2.54E-01   |      |          |
|                                                         |                       |                                  | Breed       |                             |              |                 |                   |                   |             |            |      |          |
|                                                         |                       |                                  |             | Other breeds                |              |                 |                   |                   | reference   |            |      |          |
|                                                         |                       |                                  |             | Shiba Inu                   |              |                 | 0.53              | 0.14              | <b>1.70</b> | 1.11       | 2.61 | 1.33E-04 |
|                                                         |                       |                                  |             | Toy Poodle                  |              |                 | 0.78              | 0.15              | <b>2.19</b> | 1.38       | 3.47 | 1.80E-07 |
|                                                         |                       |                                  |             | Miniature Dachshund         |              |                 | 0.41              | 0.17              | 1.51        | 0.89       | 2.59 | 1.67E-02 |
|                                                         |                       |                                  |             | Chihuahua                   |              |                 | 0.74              | 0.19              | <b>2.09</b> | 1.16       | 3.75 | 1.04E-04 |
|                                                         |                       |                                  |             | Age                         |              |                 |                   |                   |             |            |      |          |
|                                                         |                       |                                  |             | Adult                       |              |                 |                   |                   | reference   |            |      |          |
|                                                         |                       |                                  |             | Young                       |              |                 | -0.11             | 0.17              | 0.89        | 0.53       | 1.50 | 5.04E-01 |
|                                                         |                       |                                  |             | Senior                      |              |                 | -0.08             | 0.12              | 0.92        | 0.64       | 1.32 | 4.74E-01 |
|                                                         |                       |                                  |             | Geriatric                   |              |                 | -0.66             | 0.13              | <b>0.52</b> | 0.35       | 0.77 | 2.57E-07 |
|                                                         |                       |                                  |             | Other dogs in the household |              |                 |                   |                   |             |            |      |          |
|                                                         |                       |                                  |             | No                          |              |                 |                   |                   | reference   |            |      |          |
|                                                         |                       |                                  |             | Yes                         |              |                 | -0.57             | 0.11              | <b>0.57</b> | 0.41       | 0.79 | 1.43E-07 |
|                                                         |                       |                                  |             | Sex                         |              |                 |                   |                   |             |            |      |          |
|                                                         |                       |                                  |             | Female                      |              |                 |                   |                   | reference   |            |      |          |
|                                                         |                       |                                  |             | Male                        |              |                 | 0.61              | 0.09              | <b>1.85</b> | 1.38       | 2.47 | 7.23E-11 |
|                                                         |                       |                                  |             | Neutering status            |              |                 |                   |                   |             |            |      |          |
|                                                         |                       |                                  |             | Intact                      |              |                 |                   |                   | reference   |            |      |          |
|                                                         | Neutered              |                                  |             | -0.48                       | 0.11         | <b>0.62</b>     | 0.44              | 0.88              | 2.60E-05    |            |      |          |
|                                                         | Source of acquisition |                                  |             |                             |              |                 |                   |                   |             |            |      |          |
|                                                         | Breeder               |                                  |             |                             |              | reference       |                   |                   |             |            |      |          |
|                                                         | Pet store             |                                  |             | 0.40                        | 0.11         | <b>1.50</b>     | 1.06              | 2.11              | 2.87E-04    |            |      |          |
|                                                         | Rescue                |                                  |             | -0.06                       | 0.18         | 0.94            | 0.55              | 1.64              | 7.49E-01    |            |      |          |
|                                                         | Other sources         |                                  |             | 0.08                        | 0.17         | 1.09            | 0.65              | 1.82              | 6.19E-01    |            |      |          |
|                                                         | Type of residence     |                                  |             |                             |              |                 |                   |                   |             |            |      |          |
|                                                         | House                 |                                  |             |                             |              | reference       |                   |                   |             |            |      |          |
|                                                         | Apartment             |                                  |             | 0.01                        | 0.11         | 1.01            | 0.72              | 1.42              | 9.17E-01    |            |      |          |
| Tail chasing                                            | 2,036                 | 0.09                             | (Intercept) |                             | -0.72        | 0.17            |                   |                   |             | 2.43E-05   |      |          |
| Tail chasing with barking, growling, or biting the tail | 2,025                 | 0.08                             | Breed       |                             |              |                 |                   |                   |             |            |      |          |
|                                                         |                       |                                  |             | Other breeds                |              |                 |                   |                   |             |            |      |          |
|                                                         |                       |                                  |             | Shiba Inu                   |              |                 | 1.24              | 0.14              | <b>3.47</b> | 2.24       | 5.37 | 1.64E-18 |
|                                                         |                       |                                  |             | Toy Poodle                  |              |                 | -0.62             | 0.18              | <b>0.54</b> | 0.31       | 0.93 | 5.15E-04 |
|                                                         |                       |                                  |             | Miniature Dachshund         |              |                 | -0.46             | 0.21              | 0.63        | 0.33       | 1.22 | 3.13E-02 |
|                                                         |                       |                                  |             | Chihuahua                   |              |                 | -0.20             | 0.21              | 0.82        | 0.43       | 1.58 | 3.49E-01 |
|                                                         |                       |                                  |             | Age                         |              |                 |                   |                   |             |            |      |          |
|                                                         |                       |                                  |             | Adult                       |              |                 |                   |                   | reference   |            |      |          |
|                                                         |                       |                                  |             | Young                       |              |                 | 0.54              | 0.17              | <b>1.72</b> | 1.02       | 2.90 | 1.23E-03 |
|                                                         |                       |                                  |             | Senior                      |              |                 | -0.50             | 0.13              | <b>0.60</b> | 0.41       | 0.89 | 7.05E-05 |
|                                                         |                       |                                  |             | Geriatric                   |              |                 | -0.78             | 0.14              | <b>0.46</b> | 0.29       | 0.71 | 5.95E-08 |
|                                                         |                       |                                  |             | Other dogs in the household |              |                 |                   |                   |             |            |      |          |
|                                                         |                       |                                  |             | No                          |              |                 |                   |                   | reference   |            |      |          |
|                                                         |                       |                                  |             | Yes                         |              |                 | -0.47             | 0.12              | <b>0.62</b> | 0.43       | 0.91 | 1.13E-04 |
|                                                         |                       |                                  |             | Sex                         |              |                 |                   |                   |             |            |      |          |
|                                                         |                       |                                  |             | Female                      |              |                 |                   |                   | reference   |            |      |          |
|                                                         |                       |                                  |             | Male                        |              |                 | -0.14             | 0.10              | 0.87        | 0.63       | 1.20 | 1.76E-01 |
|                                                         |                       |                                  |             | Neutering status            |              |                 |                   |                   |             |            |      |          |
|                                                         |                       |                                  |             | Intact                      |              |                 |                   |                   | reference   |            |      |          |
|                                                         |                       |                                  |             | Neutered                    |              |                 | 0.00              | 0.12              | 1.00        | 0.68       | 1.47 | 9.81E-01 |
|                                                         | Source of acquisition |                                  |             |                             |              |                 |                   |                   |             |            |      |          |
|                                                         | Breeder               |                                  |             |                             |              | reference       |                   |                   |             |            |      |          |
|                                                         | Pet store             |                                  |             | 0.39                        | 0.12         | <b>1.47</b>     | 1.01              | 2.15              | 1.70E-03    |            |      |          |
|                                                         | Rescue                |                                  |             | 0.23                        | 0.19         | 1.25            | 0.69              | 2.27              | 2.37E-01    |            |      |          |
|                                                         | Other sources         |                                  |             | -0.01                       | 0.19         | 0.99            | 0.54              | 1.80              | 9.45E-01    |            |      |          |
|                                                         | Type of residence     |                                  |             |                             |              |                 |                   |                   |             |            |      |          |
|                                                         | House                 |                                  |             |                             |              | reference       |                   |                   |             |            |      |          |
|                                                         | Apartment             |                                  |             | 0.13                        | 0.12         | 1.13            | 0.79              | 1.64              | 2.92E-01    |            |      |          |
| Tail chasing with barking, growling, or biting the tail | 2,025                 | 0.08                             | (Intercept) |                             | -2.09        | 0.23            |                   |                   |             | < 2.00E-16 |      |          |
| Tail chasing with barking, growling, or biting the tail | 2,025                 | 0.08                             | Breed       |                             |              |                 |                   |                   |             |            |      |          |
|                                                         |                       |                                  |             | Other breeds                |              |                 |                   |                   |             |            |      |          |
|                                                         |                       |                                  |             | Shiba Inu                   |              |                 | 1.19              | 0.16              | <b>3.28</b> | 1.99       | 5.43 | 2.78E-13 |
|                                                         |                       |                                  |             | Toy Poodle                  |              |                 | -0.86             | 0.29              | <b>0.42</b> | 0.18       | 1.02 | 2.62E-03 |
|                                                         |                       |                                  |             | Miniature Dachshund         |              |                 | -0.20             | 0.28              | 0.82        | 0.34       | 1.96 | 4.72E-01 |
|                                                         |                       |                                  |             | Chihuahua                   |              |                 | -0.23             | 0.30              | 0.80        | 0.31       | 2.02 | 4.47E-01 |
|                                                         |                       |                                  |             | Age                         |              |                 |                   |                   |             |            |      |          |
|                                                         |                       |                                  |             | Adult                       |              |                 |                   |                   | reference   |            |      |          |
|                                                         |                       |                                  |             | Young                       |              |                 | 0.70              | 0.20              | <b>2.01</b> | 1.09       | 3.72 | 4.30E-04 |
|                                                         |                       |                                  |             | Senior                      |              |                 | -0.52             | 0.17              | <b>0.60</b> | 0.35       | 1.02 | 2.68E-03 |
|                                                         |                       |                                  |             | Geriatric                   |              |                 | -0.61             | 0.19              | <b>0.54</b> | 0.30       | 0.98 | 1.33E-03 |
|                                                         |                       |                                  |             | Other dogs in the household |              |                 |                   |                   |             |            |      |          |
|                                                         |                       |                                  |             | No                          |              |                 |                   |                   | reference   |            |      |          |
|                                                         |                       |                                  |             | Yes                         |              |                 | -0.34             | 0.17              | 0.71        | 0.43       | 1.18 | 3.75E-02 |
|                                                         |                       |                                  |             | Sex                         |              |                 |                   |                   |             |            |      |          |
|                                                         |                       |                                  |             | Female                      |              |                 |                   |                   | reference   |            |      |          |
|                                                         |                       |                                  |             | Male                        |              |                 | -0.03             | 0.13              | 0.97        | 0.64       | 1.47 | 8.42E-01 |
|                                                         |                       |                                  |             | Neutering status            |              |                 |                   |                   |             |            |      |          |
|                                                         |                       |                                  |             | Intact                      |              |                 |                   |                   | reference   |            |      |          |
|                                                         |                       |                                  |             | Neutered                    |              |                 | 0.14              | 0.16              | 1.15        | 0.70       | 1.89 | 3.92E-01 |
|                                                         | Source of acquisition |                                  |             |                             |              |                 |                   |                   |             |            |      |          |
|                                                         | Breeder               |                                  |             |                             |              | reference       |                   |                   |             |            |      |          |
|                                                         | Pet store             |                                  |             | 0.39                        | 0.16         | 1.47            | 0.89              | 2.46              | 1.85E-02    |            |      |          |
|                                                         | Rescue                |                                  |             | 0.61                        | 0.24         | 1.84            | 0.86              | 3.91              | 1.26E-02    |            |      |          |
|                                                         | Other sources         |                                  |             | 0.50                        | 0.24         | 1.65            | 0.78              | 3.52              | 4.03E-02    |            |      |          |
|                                                         | Type of residence     |                                  |             |                             |              |                 |                   |                   |             |            |      |          |
|                                                         | House                 |                                  |             |                             |              | reference       |                   |                   |             |            |      |          |
|                                                         | Apartment             |                                  |             | -0.09                       | 0.16         | 0.91            | 0.55              | 1.50              | 5.60E-01    |            |      |          |

Table S3. Relations between 25 behaviors and dogs' general information (Continued)

| Behavior                                | Number of dogs    | Pseudo R <sup>2</sup> (McFadden) |       |                             | Estimate (B) | Standard Errors | Odds ratio (ExpB) | 99.8% CI for ExpB |           | P value  |  |  |
|-----------------------------------------|-------------------|----------------------------------|-------|-----------------------------|--------------|-----------------|-------------------|-------------------|-----------|----------|--|--|
|                                         |                   |                                  |       | (Intercept)                 |              |                 |                   | Lower             | Upper     |          |  |  |
| Excessive self-grooming                 | 2,045             | 0.03                             |       | (Intercept)                 | 0.34         | 0.16            |                   |                   |           | 3.24E-02 |  |  |
|                                         |                   |                                  | Breed |                             |              |                 |                   |                   |           |          |  |  |
|                                         |                   |                                  |       | Other breeds                |              |                 |                   |                   | reference |          |  |  |
|                                         |                   |                                  |       | Shiba Inu                   | 0.36         | 0.15            | 1.43              | 0.91              | 2.25      | 1.48E-02 |  |  |
|                                         |                   |                                  |       | Toy Poodle                  | 0.42         | 0.16            | 1.52              | 0.94              | 2.46      | 7.66E-03 |  |  |
|                                         |                   |                                  |       | Miniature Dachshund         | 0.11         | 0.18            | 1.11              | 0.65              | 1.92      | 5.41E-01 |  |  |
|                                         |                   |                                  |       | Chihuahua                   | 0.13         | 0.19            | 1.14              | 0.63              | 2.06      | 5.04E-01 |  |  |
|                                         |                   |                                  |       | Age                         |              |                 |                   |                   |           |          |  |  |
|                                         |                   |                                  |       | Adult                       |              |                 |                   |                   | reference |          |  |  |
|                                         |                   |                                  |       | Young                       | -0.53        | 0.16            | 0.59              | 0.35              | 0.97      | 1.08E-03 |  |  |
|                                         |                   |                                  |       | Senior                      | 0.25         | 0.12            | 1.28              | 0.88              | 1.85      | 3.93E-02 |  |  |
|                                         |                   |                                  |       | Geriatric                   | 0.27         | 0.13            | 1.31              | 0.88              | 1.95      | 3.45E-02 |  |  |
|                                         |                   |                                  |       | Other dogs in the household |              |                 |                   |                   |           |          |  |  |
|                                         |                   |                                  |       | No                          |              |                 |                   |                   | reference |          |  |  |
|                                         |                   |                                  |       | Yes                         | -0.51        | 0.11            | 0.60              | 0.44              | 0.84      | 1.62E-06 |  |  |
|                                         |                   |                                  |       | Sex                         |              |                 |                   |                   |           |          |  |  |
|                                         |                   |                                  |       | Female                      |              |                 |                   |                   | reference |          |  |  |
|                                         |                   |                                  |       | Male                        | -0.02        | 0.10            | 0.98              | 0.73              | 1.31      | 8.15E-01 |  |  |
|                                         |                   |                                  |       | Neutering status            |              |                 |                   |                   |           |          |  |  |
|                                         |                   |                                  |       | Intact                      |              |                 |                   |                   | reference |          |  |  |
|                                         |                   |                                  |       | Neutered                    | 0.21         | 0.11            | 1.24              | 0.87              | 1.75      | 6.01E-02 |  |  |
|                                         |                   |                                  |       | Source of acquisition       |              |                 |                   |                   |           |          |  |  |
|                                         |                   |                                  |       | Breeder                     |              |                 |                   |                   | reference |          |  |  |
|                                         | Pet store         | 0.25                             | 0.11  | 1.29                        | 0.91         | 1.82            | 2.44E-02          |                   |           |          |  |  |
|                                         | Rescue            | -0.03                            | 0.17  | 0.97                        | 0.57         | 1.67            | 8.78E-01          |                   |           |          |  |  |
|                                         | Other sources     | 0.00                             | 0.17  | 1.00                        | 0.60         | 1.66            | 9.83E-01          |                   |           |          |  |  |
|                                         | Type of residence |                                  |       |                             |              |                 |                   |                   |           |          |  |  |
|                                         | House             |                                  |       |                             |              | reference       |                   |                   |           |          |  |  |
|                                         | Apartment         | -0.09                            | 0.11  | 0.92                        | 0.65         | 1.29            | 4.44E-01          |                   |           |          |  |  |
| Staring or snapping at the air          | 2,012             | 0.01                             |       | (Intercept)                 | -1.10        | 0.17            |                   |                   |           | 1.19E-10 |  |  |
|                                         |                   |                                  | Breed |                             |              |                 |                   |                   |           |          |  |  |
|                                         |                   |                                  |       | Other breeds                |              |                 |                   |                   | reference |          |  |  |
|                                         |                   |                                  |       | Shiba Inu                   | 0.42         | 0.14            | 1.53              | 0.98              | 2.39      | 3.18E-03 |  |  |
|                                         |                   |                                  |       | Toy Poodle                  | -0.13        | 0.17            | 0.88              | 0.53              | 1.47      | 4.45E-01 |  |  |
|                                         |                   |                                  |       | Miniature Dachshund         | 0.18         | 0.18            | 1.20              | 0.68              | 2.09      | 3.25E-01 |  |  |
|                                         |                   |                                  |       | Chihuahua                   | -0.22        | 0.22            | 0.80              | 0.41              | 1.56      | 3.03E-01 |  |  |
|                                         |                   |                                  |       | Age                         |              |                 |                   |                   |           |          |  |  |
|                                         |                   |                                  |       | Adult                       |              |                 |                   |                   | reference |          |  |  |
|                                         |                   |                                  |       | Young                       | 0.07         | 0.18            | 1.07              | 0.61              | 1.89      | 7.05E-01 |  |  |
|                                         |                   |                                  |       | Senior                      | 0.07         | 0.13            | 1.07              | 0.72              | 1.59      | 5.89E-01 |  |  |
|                                         |                   |                                  |       | Geriatric                   | 0.26         | 0.13            | 1.29              | 0.86              | 1.95      | 5.50E-02 |  |  |
|                                         |                   |                                  |       | Other dogs in the household |              |                 |                   |                   |           |          |  |  |
|                                         |                   |                                  |       | No                          |              |                 |                   |                   | reference |          |  |  |
|                                         |                   |                                  |       | Yes                         | -0.19        | 0.12            | 0.82              | 0.57              | 1.18      | 9.96E-02 |  |  |
|                                         |                   |                                  |       | Sex                         |              |                 |                   |                   |           |          |  |  |
|                                         |                   |                                  |       | Female                      |              |                 |                   |                   | reference |          |  |  |
|                                         |                   |                                  |       | Male                        | 0.09         | 0.10            | 1.09              | 0.80              | 1.50      | 3.88E-01 |  |  |
|                                         |                   |                                  |       | Neutering status            |              |                 |                   |                   |           |          |  |  |
|                                         |                   |                                  |       | Intact                      |              |                 |                   |                   | reference |          |  |  |
|                                         |                   |                                  |       | Neutered                    | -0.08        | 0.12            | 0.92              | 0.63              | 1.34      | 4.92E-01 |  |  |
|                                         |                   |                                  |       | Source of acquisition       |              |                 |                   |                   |           |          |  |  |
|                                         |                   |                                  |       | Breeder                     |              |                 |                   |                   | reference |          |  |  |
|                                         | Pet store         | -0.04                            | 0.12  | 0.97                        | 0.66         | 1.40            | 7.72E-01          |                   |           |          |  |  |
|                                         | Rescue            | 0.22                             | 0.18  | 1.25                        | 0.70         | 2.20            | 2.35E-01          |                   |           |          |  |  |
|                                         | Other sources     | 0.13                             | 0.18  | 1.13                        | 0.66         | 1.95            | 4.76E-01          |                   |           |          |  |  |
|                                         | Type of residence |                                  |       |                             |              |                 |                   |                   |           |          |  |  |
|                                         | House             |                                  |       |                             |              | reference       |                   |                   |           |          |  |  |
|                                         | Apartment         | 0.11                             | 0.12  | 1.12                        | 0.78         | 1.61            | 3.41E-01          |                   |           |          |  |  |
| Staring at or chasing lights or shadows | 1,988             | 0.02                             |       | (Intercept)                 | -1.21        | 0.19            |                   |                   |           | 3.02E-10 |  |  |
|                                         |                   |                                  | Breed |                             |              |                 |                   |                   |           |          |  |  |
|                                         |                   |                                  |       | Other breeds                |              |                 |                   |                   | reference |          |  |  |
|                                         |                   |                                  |       | Shiba Inu                   | 0.33         | 0.16            | 1.39              | 0.85              | 2.28      | 3.77E-02 |  |  |
|                                         |                   |                                  |       | Toy Poodle                  | -0.23        | 0.19            | 0.80              | 0.44              | 1.44      | 2.38E-01 |  |  |
|                                         |                   |                                  |       | Miniature Dachshund         | -0.25        | 0.23            | 0.78              | 0.38              | 1.60      | 2.82E-01 |  |  |
|                                         |                   |                                  |       | Chihuahua                   | -0.46        | 0.26            | 0.63              | 0.28              | 1.42      | 7.95E-02 |  |  |
|                                         |                   |                                  |       | Age                         |              |                 |                   |                   |           |          |  |  |
|                                         |                   |                                  |       | Adult                       |              |                 |                   |                   | reference |          |  |  |
|                                         |                   |                                  |       | Young                       | 0.19         | 0.19            | 1.21              | 0.67              | 2.20      | 3.13E-01 |  |  |
|                                         |                   |                                  |       | Senior                      | -0.25        | 0.14            | 0.78              | 0.50              | 1.21      | 7.62E-02 |  |  |
|                                         |                   |                                  |       | Geriatric                   | -0.50        | 0.16            | 0.61              | 0.37              | 1.00      | 2.09E-03 |  |  |
|                                         |                   |                                  |       | Other dogs in the household |              |                 |                   |                   |           |          |  |  |
|                                         |                   |                                  |       | No                          |              |                 |                   |                   | reference |          |  |  |
|                                         |                   |                                  |       | Yes                         | -0.25        | 0.14            | 0.78              | 0.51              | 1.20      | 7.40E-02 |  |  |
|                                         |                   |                                  |       | Sex                         |              |                 |                   |                   |           |          |  |  |
|                                         |                   |                                  |       | Female                      |              |                 |                   |                   | reference |          |  |  |
|                                         |                   |                                  |       | Male                        | -0.15        | 0.12            | 0.86              | 0.60              | 1.24      | 2.05E-01 |  |  |
|                                         |                   |                                  |       | Neutering status            |              |                 |                   |                   |           |          |  |  |
|                                         |                   |                                  |       | Intact                      |              |                 |                   |                   | reference |          |  |  |
|                                         |                   |                                  |       | Neutered                    | 0.07         | 0.14            | 1.08              | 0.70              | 1.66      | 6.01E-01 |  |  |
|                                         |                   |                                  |       | Source of acquisition       |              |                 |                   |                   |           |          |  |  |
|                                         |                   |                                  |       | Breeder                     |              |                 |                   |                   | reference |          |  |  |
|                                         | Pet store         | 0.04                             | 0.14  | 1.04                        | 0.68         | 1.59            | 7.61E-01          |                   |           |          |  |  |
|                                         | Rescue            | -0.17                            | 0.22  | 0.84                        | 0.42         | 1.68            | 4.38E-01          |                   |           |          |  |  |
|                                         | Other sources     | 0.02                             | 0.21  | 1.02                        | 0.54         | 1.95            | 9.06E-01          |                   |           |          |  |  |
|                                         | Type of residence |                                  |       |                             |              |                 |                   |                   |           |          |  |  |
|                                         | House             |                                  |       |                             |              | reference       |                   |                   |           |          |  |  |
|                                         | Apartment         | 0.06                             | 0.13  | 1.06                        | 0.70         | 1.60            | 6.80E-01          |                   |           |          |  |  |



Table S3. Relations between 25 behaviors and dogs' general information (Continued)

| Behavior                                              | Number of dogs | Pseudo R <sup>2</sup> (McFadden) |                             | Estimate (B) | Standard Errors | Odds ratio (ExpB) | 99.8% CI for ExpB |             | P value  |      |          |
|-------------------------------------------------------|----------------|----------------------------------|-----------------------------|--------------|-----------------|-------------------|-------------------|-------------|----------|------|----------|
|                                                       |                |                                  |                             |              |                 |                   | Lower             | Upper       |          |      |          |
| Fear of unfamiliar approaching people                 | 2,023          | 0.04                             | (Intercept)                 | -0.38        | 0.16            |                   |                   |             | 1.77E-02 |      |          |
|                                                       |                |                                  | Breed                       |              |                 |                   |                   |             |          |      |          |
|                                                       |                |                                  | Other breeds                |              |                 |                   |                   | reference   |          |      |          |
|                                                       |                |                                  | Shiba Inu                   |              |                 | -0.12             | 0.15              | 0.89        | 0.56     | 1.39 | 4.12E-01 |
|                                                       |                |                                  | Toy Poodle                  |              |                 | 0.57              | 0.15              | <b>1.77</b> | 1.13     | 2.78 | 8.36E-05 |
|                                                       |                |                                  | Miniature Dachshund         |              |                 | 0.92              | 0.17              | <b>2.51</b> | 1.49     | 4.23 | 5.78E-08 |
|                                                       |                |                                  | Chihuahua                   |              |                 | 0.90              | 0.19              | <b>2.47</b> | 1.39     | 4.38 | 1.20E-06 |
|                                                       |                |                                  | Age                         |              |                 |                   |                   |             |          |      |          |
|                                                       |                |                                  | Adult                       |              |                 |                   |                   |             |          |      |          |
|                                                       |                |                                  | Young                       |              |                 | -0.18             | 0.17              | 0.84        | 0.49     | 1.41 | 2.93E-01 |
|                                                       |                |                                  | Senior                      |              |                 | -0.26             | 0.12              | 0.77        | 0.54     | 1.11 | 2.86E-02 |
|                                                       |                |                                  | Geriatric                   |              |                 | -0.44             | 0.13              | <i>0.64</i> | 0.43     | 0.95 | 5.57E-04 |
|                                                       |                |                                  | Other dogs in the household |              |                 |                   |                   |             |          |      |          |
|                                                       |                |                                  | No                          |              |                 |                   |                   |             |          |      |          |
|                                                       |                |                                  | Yes                         |              |                 | -0.12             | 0.11              | 0.89        | 0.64     | 1.24 | 2.82E-01 |
|                                                       |                |                                  | Sex                         |              |                 |                   |                   |             |          |      |          |
|                                                       |                |                                  | Female                      |              |                 |                   |                   |             |          |      |          |
|                                                       |                |                                  | Male                        |              |                 | -0.32             | 0.10              | <i>0.72</i> | 0.54     | 0.97 | 7.05E-04 |
|                                                       |                |                                  | Neutering status            |              |                 |                   |                   |             |          |      |          |
|                                                       |                |                                  | Intact                      |              |                 |                   |                   |             |          |      |          |
|                                                       |                |                                  | Neutered                    |              |                 | 0.08              | 0.12              | 1.08        | 0.75     | 1.54 | 5.11E-01 |
|                                                       |                |                                  | Source of acquisition       |              |                 |                   |                   |             |          |      |          |
|                                                       |                |                                  | Breeder                     |              |                 |                   |                   |             |          |      |          |
| Pet store                                             |                |                                  | -0.19                       | 0.11         | 0.83            | 0.59              | 1.17              | 9.63E-02    |          |      |          |
| Rescue                                                |                |                                  | 0.67                        | 0.17         | <b>1.95</b>     | 1.15              | 3.32              | 9.29E-05    |          |      |          |
| Other sources                                         |                |                                  | -0.06                       | 0.17         | 0.94            | 0.56              | 1.58              | 7.03E-01    |          |      |          |
| Type of residence                                     |                |                                  |                             |              |                 |                   |                   |             |          |      |          |
| House                                                 |                |                                  |                             |              |                 |                   |                   |             |          |      |          |
| Apartment                                             |                |                                  | 0.05                        | 0.11         | 1.05            | 0.75              | 1.48              | 6.55E-01    |          |      |          |
| Fear of unfamiliar approaching dogs                   | 2,023          | 0.04                             | (Intercept)                 | 0.17         | 0.15            |                   |                   |             | 2.82E-01 |      |          |
|                                                       |                |                                  | Breed                       |              |                 |                   |                   |             |          |      |          |
|                                                       |                |                                  | Other breeds                |              |                 |                   |                   |             |          |      |          |
|                                                       |                |                                  | Shiba Inu                   |              |                 | -0.64             | 0.14              | <i>0.53</i> | 0.34     | 0.81 | 4.34E-06 |
|                                                       |                |                                  | Toy Poodle                  |              |                 | 0.50              | 0.15              | <b>1.65</b> | 1.05     | 2.60 | 6.44E-04 |
|                                                       |                |                                  | Miniature Dachshund         |              |                 | 0.82              | 0.18              | <b>2.27</b> | 1.31     | 3.93 | 4.40E-06 |
|                                                       |                |                                  | Chihuahua                   |              |                 | 0.44              | 0.19              | 1.56        | 0.87     | 2.77 | 1.82E-02 |
|                                                       |                |                                  | Age                         |              |                 |                   |                   |             |          |      |          |
|                                                       |                |                                  | Adult                       |              |                 |                   |                   |             |          |      |          |
|                                                       |                |                                  | Young                       |              |                 | -0.34             | 0.17              | 0.71        | 0.43     | 1.19 | 4.17E-02 |
|                                                       |                |                                  | Senior                      |              |                 | 0.16              | 0.11              | 1.17        | 0.82     | 1.67 | 1.72E-01 |
|                                                       |                |                                  | Geriatric                   |              |                 | -0.20             | 0.12              | 0.82        | 0.56     | 1.19 | 9.70E-02 |
|                                                       |                |                                  | Other dogs in the household |              |                 |                   |                   |             |          |      |          |
|                                                       |                |                                  | No                          |              |                 |                   |                   |             |          |      |          |
|                                                       |                |                                  | Yes                         |              |                 | -0.40             | 0.10              | <i>0.67</i> | 0.48     | 0.93 | 1.37E-04 |
|                                                       |                |                                  | Sex                         |              |                 |                   |                   |             |          |      |          |
|                                                       |                |                                  | Female                      |              |                 |                   |                   |             |          |      |          |
|                                                       |                |                                  | Male                        |              |                 | -0.41             | 0.09              | <i>0.67</i> | 0.50     | 0.89 | 1.31E-05 |
|                                                       |                |                                  | Neutering status            |              |                 |                   |                   |             |          |      |          |
|                                                       |                |                                  | Intact                      |              |                 |                   |                   |             |          |      |          |
|                                                       |                |                                  | Neutered                    |              |                 | 0.10              | 0.11              | 1.10        | 0.78     | 1.56 | 3.73E-01 |
|                                                       |                |                                  | Source of acquisition       |              |                 |                   |                   |             |          |      |          |
|                                                       |                |                                  | Breeder                     |              |                 |                   |                   |             |          |      |          |
| Pet store                                             |                |                                  | 0.24                        | 0.11         | 1.28            | 0.91              | 1.79              | 2.60E-02    |          |      |          |
| Rescue                                                |                |                                  | 0.18                        | 0.17         | 1.20            | 0.71              | 2.03              | 2.89E-01    |          |      |          |
| Other sources                                         |                |                                  | -0.12                       | 0.16         | 0.89            | 0.54              | 1.47              | 4.62E-01    |          |      |          |
| Type of residence                                     |                |                                  |                             |              |                 |                   |                   |             |          |      |          |
| House                                                 |                |                                  |                             |              |                 |                   |                   |             |          |      |          |
| Apartment                                             |                |                                  | -0.04                       | 0.11         | 0.96            | 0.69              | 1.34              | 6.86E-01    |          |      |          |
| Fear of loud noises, such as thunder and/or fireworks | 2,005          | 0.01                             | (Intercept)                 | 0.56         | 0.16            |                   |                   |             | 3.17E-04 |      |          |
|                                                       |                |                                  | Breed                       |              |                 |                   |                   |             |          |      |          |
|                                                       |                |                                  | Other breeds                |              |                 |                   |                   |             |          |      |          |
|                                                       |                |                                  | Shiba Inu                   |              |                 | 0.05              | 0.14              | 1.05        | 0.69     | 1.61 | 7.18E-01 |
|                                                       |                |                                  | Toy Poodle                  |              |                 | 0.21              | 0.15              | 1.23        | 0.78     | 1.95 | 1.61E-01 |
|                                                       |                |                                  | Miniature Dachshund         |              |                 | -0.13             | 0.17              | 0.88        | 0.52     | 1.48 | 4.50E-01 |
|                                                       |                |                                  | Chihuahua                   |              |                 | 0.32              | 0.19              | 1.37        | 0.76     | 2.49 | 1.00E-01 |
|                                                       |                |                                  | Age                         |              |                 |                   |                   |             |          |      |          |
|                                                       |                |                                  | Adult                       |              |                 |                   |                   |             |          |      |          |
|                                                       |                |                                  | Young                       |              |                 | -0.36             | 0.17              | 0.70        | 0.42     | 1.17 | 3.29E-02 |
|                                                       |                |                                  | Senior                      |              |                 | 0.26              | 0.12              | 1.30        | 0.91     | 1.86 | 2.46E-02 |
|                                                       |                |                                  | Geriatric                   |              |                 | -0.18             | 0.12              | 0.84        | 0.58     | 1.22 | 1.48E-01 |
|                                                       |                |                                  | Other dogs in the household |              |                 |                   |                   |             |          |      |          |
|                                                       |                |                                  | No                          |              |                 |                   |                   |             |          |      |          |
|                                                       |                |                                  | Yes                         |              |                 | -0.19             | 0.10              | 0.83        | 0.60     | 1.14 | 7.26E-02 |
|                                                       |                |                                  | Sex                         |              |                 |                   |                   |             |          |      |          |
|                                                       |                |                                  | Female                      |              |                 |                   |                   |             |          |      |          |
|                                                       |                |                                  | Male                        |              |                 | -0.23             | 0.09              | 0.79        | 0.59     | 1.06 | 1.30E-02 |
|                                                       |                |                                  | Neutering status            |              |                 |                   |                   |             |          |      |          |
|                                                       |                |                                  | Intact                      |              |                 |                   |                   |             |          |      |          |
|                                                       |                |                                  | Neutered                    |              |                 | -0.05             | 0.11              | 0.96        | 0.68     | 1.35 | 6.88E-01 |
|                                                       |                |                                  | Source of acquisition       |              |                 |                   |                   |             |          |      |          |
|                                                       |                |                                  | Breeder                     |              |                 |                   |                   |             |          |      |          |
| Pet store                                             |                |                                  | 0.03                        | 0.11         | 1.03            | 0.73              | 1.44              | 8.00E-01    |          |      |          |
| Rescue                                                |                |                                  | 0.19                        | 0.17         | 1.21            | 0.71              | 2.08              | 2.70E-01    |          |      |          |
| Other sources                                         |                |                                  | 0.06                        | 0.16         | 1.06            | 0.64              | 1.76              | 7.30E-01    |          |      |          |
| Type of residence                                     |                |                                  |                             |              |                 |                   |                   |             |          |      |          |
| House                                                 |                |                                  |                             |              |                 |                   |                   |             |          |      |          |
| Apartment                                             |                |                                  | -0.05                       | 0.11         | 0.95            | 0.68              | 1.33              | 6.63E-01    |          |      |          |

Table S3. Relations between 25 behaviors and dogs' general information (Continued)

| Behavior                                    | Number of dogs | Pseudo R <sup>2</sup> (McFadden) | Estimate (B)                | Standard Errors | Odds ratio (ExpB) | 99.8% CI for ExpB |       | P value |          |  |
|---------------------------------------------|----------------|----------------------------------|-----------------------------|-----------------|-------------------|-------------------|-------|---------|----------|--|
|                                             |                |                                  |                             |                 |                   | Lower             | Upper |         |          |  |
| Showing fear while on the examination table | 2,040          | 0.03                             | (Intercept)                 | 0.79            | 0.17              |                   |       |         | 1.65E-06 |  |
|                                             |                |                                  | Breed                       |                 |                   |                   |       |         |          |  |
|                                             |                |                                  | Other breeds                |                 |                   | reference         |       |         |          |  |
|                                             |                |                                  | Shiba Inu                   | 0.54            | 0.16              | <b>1.72</b>       | 1.05  | 2.80    | 6.71E-04 |  |
|                                             |                |                                  | Toy Poodle                  | 0.40            | 0.16              | 1.49              | 0.90  | 2.47    | 1.45E-02 |  |
|                                             |                |                                  | Miniature Dachshund         | 0.27            | 0.19              | 1.31              | 0.73  | 2.35    | 1.59E-01 |  |
|                                             |                |                                  | Chihuahua                   | 0.49            | 0.21              | 1.64              | 0.84  | 3.18    | 2.12E-02 |  |
|                                             |                |                                  | Age                         |                 |                   |                   |       |         |          |  |
|                                             |                |                                  | Adult                       |                 |                   | reference         |       |         |          |  |
|                                             |                |                                  | Young                       | -0.51           | 0.17              | 0.60              | 0.36  | 1.00    | 2.12E-03 |  |
|                                             |                |                                  | Senior                      | 0.25            | 0.13              | 1.28              | 0.87  | 1.89    | 4.87E-02 |  |
|                                             |                |                                  | Geriatric                   | 0.33            | 0.14              | 1.38              | 0.90  | 2.12    | 1.81E-02 |  |
|                                             |                |                                  | Other dogs in the household |                 |                   |                   |       |         |          |  |
|                                             |                |                                  | No                          |                 |                   | reference         |       |         |          |  |
|                                             |                |                                  | Yes                         | -0.29           | 0.11              | 0.75              | 0.53  | 1.06    | 9.22E-03 |  |
|                                             |                |                                  | Sex                         |                 |                   |                   |       |         |          |  |
|                                             |                |                                  | Female                      |                 |                   | reference         |       |         |          |  |
|                                             |                |                                  | Male                        | -0.28           | 0.10              | 0.75              | 0.55  | 1.03    | 5.40E-03 |  |
|                                             |                |                                  | Neutering status            |                 |                   |                   |       |         |          |  |
|                                             |                |                                  | Intact                      |                 |                   | reference         |       |         |          |  |
|                                             |                |                                  | Neutered                    | 0.07            | 0.12              | 1.07              | 0.74  | 1.55    | 5.77E-01 |  |
|                                             |                |                                  | Source of acquisition       |                 |                   |                   |       |         |          |  |
|                                             |                |                                  | Breeder                     |                 |                   | reference         |       |         |          |  |
| Pet store                                   | -0.06          | 0.12                             | 0.94                        | 0.65            | 1.36              | 6.11E-01          |       |         |          |  |
| Rescue                                      | 0.38           | 0.20                             | 1.46                        | 0.80            | 2.67              | 5.36E-02          |       |         |          |  |
| Other sources                               | 0.17           | 0.18                             | 1.19                        | 0.68            | 2.09              | 3.43E-01          |       |         |          |  |
| Type of residence                           |                |                                  |                             |                 |                   |                   |       |         |          |  |
| House                                       |                |                                  | reference                   |                 |                   |                   |       |         |          |  |
| Apartment                                   | 0.11           | 0.12                             | 1.11                        | 0.77            | 1.61              | 3.70E-01          |       |         |          |  |
| Aggression toward family members            | 2,046          | 0.04                             | (Intercept)                 | -1.33           | 0.17              |                   |       |         | 9.39E-15 |  |
|                                             |                |                                  | Breed                       |                 |                   |                   |       |         |          |  |
|                                             |                |                                  | Other breeds                |                 |                   | reference         |       |         |          |  |
|                                             |                |                                  | Shiba Inu                   | 0.74            | 0.14              | <b>2.11</b>       | 1.36  | 3.25    | 1.25E-07 |  |
|                                             |                |                                  | Toy Poodle                  | 0.59            | 0.15              | <b>1.81</b>       | 1.14  | 2.88    | 8.27E-05 |  |
|                                             |                |                                  | Miniature Dachshund         | -0.12           | 0.20              | 0.89              | 0.48  | 1.64    | 5.40E-01 |  |
|                                             |                |                                  | Chihuahua                   | 0.76            | 0.19              | <b>2.15</b>       | 1.20  | 3.84    | 4.87E-05 |  |
|                                             |                |                                  | Age                         |                 |                   |                   |       |         |          |  |
|                                             |                |                                  | Adult                       |                 |                   | reference         |       |         |          |  |
|                                             |                |                                  | Young                       | -0.04           | 0.17              | 0.96              | 0.56  | 1.64    | 8.00E-01 |  |
|                                             |                |                                  | Senior                      | -0.31           | 0.12              | 0.73              | 0.50  | 1.07    | 1.18E-02 |  |
|                                             |                |                                  | Geriatric                   | -0.38           | 0.14              | 0.69              | 0.45  | 1.04    | 5.63E-03 |  |
|                                             |                |                                  | Other dogs in the household |                 |                   |                   |       |         |          |  |
|                                             |                |                                  | No                          |                 |                   | reference         |       |         |          |  |
|                                             |                |                                  | Yes                         | -0.32           | 0.12              | 0.73              | 0.51  | 1.05    | 7.00E-03 |  |
|                                             |                |                                  | Sex                         |                 |                   |                   |       |         |          |  |
|                                             |                |                                  | Female                      |                 |                   | reference         |       |         |          |  |
|                                             |                |                                  | Male                        | 0.35            | 0.10              | <b>1.41</b>       | 1.03  | 1.93    | 6.13E-04 |  |
|                                             |                |                                  | Neutering status            |                 |                   |                   |       |         |          |  |
|                                             |                |                                  | Intact                      |                 |                   | reference         |       |         |          |  |
|                                             |                |                                  | Neutered                    | 0.09            | 0.12              | 1.09              | 0.75  | 1.58    | 4.69E-01 |  |
|                                             |                |                                  | Source of acquisition       |                 |                   |                   |       |         |          |  |
|                                             |                |                                  | Breeder                     |                 |                   | reference         |       |         |          |  |
| Pet store                                   | 0.38           | 0.12                             | <b>1.47</b>                 | 1.01            | 2.13              | 1.37E-03          |       |         |          |  |
| Rescue                                      | -0.03          | 0.20                             | 0.97                        | 0.52            | 1.80              | 8.73E-01          |       |         |          |  |
| Other sources                               | 0.29           | 0.18                             | 1.34                        | 0.77            | 2.34              | 1.02E-01          |       |         |          |  |
| Type of residence                           |                |                                  |                             |                 |                   |                   |       |         |          |  |
| House                                       |                |                                  | reference                   |                 |                   |                   |       |         |          |  |
| Apartment                                   | -0.03          | 0.12                             | 0.97                        | 0.68            | 1.39              | 7.80E-01          |       |         |          |  |
| Aggression toward unfamiliar people         | 2,026          | 0.03                             | (Intercept)                 | -0.32           | 0.16              |                   |       |         | 4.07E-02 |  |
|                                             |                |                                  | Breed                       |                 |                   |                   |       |         |          |  |
|                                             |                |                                  | Other breeds                |                 |                   | reference         |       |         |          |  |
|                                             |                |                                  | Shiba Inu                   | -0.22           | 0.14              | 0.80              | 0.52  | 1.24    | 1.22E-01 |  |
|                                             |                |                                  | Toy Poodle                  | 0.09            | 0.15              | 1.09              | 0.69  | 1.71    | 5.54E-01 |  |
|                                             |                |                                  | Miniature Dachshund         | 0.37            | 0.17              | 1.44              | 0.86  | 2.43    | 2.84E-02 |  |
|                                             |                |                                  | Chihuahua                   | 1.15            | 0.19              | <b>3.15</b>       | 1.75  | 5.68    | 1.78E-09 |  |
|                                             |                |                                  | Age                         |                 |                   |                   |       |         |          |  |
|                                             |                |                                  | Adult                       |                 |                   | reference         |       |         |          |  |
|                                             |                |                                  | Young                       | -0.51           | 0.17              | 0.60              | 0.35  | 1.03    | 3.26E-03 |  |
|                                             |                |                                  | Senior                      | -0.02           | 0.11              | 0.98              | 0.69  | 1.40    | 8.63E-01 |  |
|                                             |                |                                  | Geriatric                   | -0.25           | 0.12              | 0.78              | 0.53  | 1.14    | 4.53E-02 |  |
|                                             |                |                                  | Other dogs in the household |                 |                   |                   |       |         |          |  |
|                                             |                |                                  | No                          |                 |                   | reference         |       |         |          |  |
|                                             |                |                                  | Yes                         | -0.09           | 0.11              | 0.92              | 0.66  | 1.27    | 4.03E-01 |  |
|                                             |                |                                  | Sex                         |                 |                   |                   |       |         |          |  |
|                                             |                |                                  | Female                      |                 |                   | reference         |       |         |          |  |
|                                             |                |                                  | Male                        | 0.21            | 0.09              | 1.23              | 0.92  | 1.64    | 2.61E-02 |  |
|                                             |                |                                  | Neutering status            |                 |                   |                   |       |         |          |  |
|                                             |                |                                  | Intact                      |                 |                   | reference         |       |         |          |  |
|                                             |                |                                  | Neutered                    | -0.16           | 0.11              | 0.85              | 0.60  | 1.20    | 1.42E-01 |  |
|                                             |                |                                  | Source of acquisition       |                 |                   |                   |       |         |          |  |
|                                             |                |                                  | Breeder                     |                 |                   | reference         |       |         |          |  |
| Pet store                                   | 0.05           | 0.11                             | 1.05                        | 0.74            | 1.47              | 6.77E-01          |       |         |          |  |
| Rescue                                      | 0.29           | 0.17                             | 1.33                        | 0.79            | 2.25              | 9.35E-02          |       |         |          |  |
| Other sources                               | 0.33           | 0.16                             | 1.39                        | 0.84            | 2.30              | 4.11E-02          |       |         |          |  |
| Type of residence                           |                |                                  |                             |                 |                   |                   |       |         |          |  |
| House                                       |                |                                  | reference                   |                 |                   |                   |       |         |          |  |
| Apartment                                   | -0.25          | 0.11                             | 0.78                        | 0.56            | 1.10              | 2.48E-02          |       |         |          |  |

Table S3. Relations between 25 behaviors and dogs' general information (Continued)

| Behavior                          | Number of dogs | Pseudo R <sup>2</sup> (McFadden) |                             | Estimate (B) | Standard Errors | Odds ratio (ExpB) | 99.8% CI for ExpB |           | P value   |  |  |
|-----------------------------------|----------------|----------------------------------|-----------------------------|--------------|-----------------|-------------------|-------------------|-----------|-----------|--|--|
|                                   |                |                                  |                             |              |                 |                   | Lower             | Upper     |           |  |  |
| Aggression toward unfamiliar dogs | 2,028          | 0.02                             | (Intercept)                 | -0.13        | 0.15            |                   |                   |           | 3.77E-01  |  |  |
|                                   |                |                                  | Breed                       |              |                 |                   |                   |           |           |  |  |
|                                   |                |                                  | Other breeds                |              |                 |                   |                   | reference |           |  |  |
|                                   |                |                                  | Shiba Inu                   | 0.18         | 0.13            | 1.20              | 0.79              | 1.82      | 1.83E-01  |  |  |
|                                   |                |                                  | Toy Poodle                  | -0.02        | 0.14            | 0.98              | 0.63              | 1.52      | 8.80E-01  |  |  |
|                                   |                |                                  | Miniature Dachshund         | -0.01        | 0.17            | 0.99              | 0.59              | 1.65      | 9.31E-01  |  |  |
|                                   |                |                                  | Chihuahua                   | 0.48         | 0.19            | 1.62              | 0.90              | 2.90      | 1.11E-02  |  |  |
|                                   |                |                                  | Age                         |              |                 |                   |                   |           |           |  |  |
|                                   |                |                                  | Adult                       |              |                 |                   |                   |           | reference |  |  |
|                                   |                |                                  | Young                       | -0.79        | 0.17            | <i>0.45</i>       | 0.27              | 0.76      | 2.83E-06  |  |  |
|                                   |                |                                  | Senior                      | 0.14         | 0.11            | 1.15              | 0.81              | 1.63      | 2.17E-01  |  |  |
|                                   |                |                                  | Geriatric                   | -0.10        | 0.12            | 0.91              | 0.63              | 1.32      | 4.19E-01  |  |  |
|                                   |                |                                  | Other dogs in the household |              |                 |                   |                   |           |           |  |  |
|                                   |                |                                  | No                          |              |                 |                   |                   |           | reference |  |  |
|                                   |                |                                  | Yes                         | 0.03         | 0.10            | 1.03              | 0.75              | 1.42      | 7.70E-01  |  |  |
|                                   |                |                                  | Sex                         |              |                 |                   |                   |           |           |  |  |
|                                   |                |                                  | Female                      |              |                 |                   |                   |           | reference |  |  |
|                                   |                |                                  | Male                        | 0.23         | 0.09            | 1.26              | 0.95              | 1.67      | 1.10E-02  |  |  |
|                                   |                |                                  | Neutering status            |              |                 |                   |                   |           |           |  |  |
|                                   |                |                                  | Intact                      |              |                 |                   |                   |           | reference |  |  |
|                                   |                |                                  | Neutered                    | 0.08         | 0.11            | 1.08              | 0.77              | 1.52      | 4.61E-01  |  |  |
|                                   |                |                                  | Source of acquisition       |              |                 |                   |                   |           |           |  |  |
|                                   |                |                                  | Breeder                     |              |                 |                   |                   |           | reference |  |  |
|                                   |                |                                  | Pet store                   | 0.00         | 0.11            | 1.00              | 0.72              | 1.40      | 9.70E-01  |  |  |
|                                   |                |                                  | Rescue                      | 0.13         | 0.17            | 1.13              | 0.68              | 1.91      | 4.52E-01  |  |  |
|                                   |                |                                  | Other sources               | 0.36         | 0.16            | 1.44              | 0.87              | 2.38      | 2.49E-02  |  |  |
|                                   |                |                                  | Type of residence           |              |                 |                   |                   |           |           |  |  |
| House                             |                |                                  |                             |              |                 | reference         |                   |           |           |  |  |
| Apartment                         | -0.02          | 0.11                             | 0.98                        | 0.71         | 1.36            | 8.81E-01          |                   |           |           |  |  |

Notes: Significance level:  $P < 0.002$ .

Odds ratios  $> 1$  are bolded and in red .

Odds ratios  $< 1$  are italicized and in blue.
